# Supplementary material for: Identification of 13 Novel Loci in a Genome-Wide Association Study on Taiwanese with Hepatocellular Carcinoma
Source: MDPI journal article supplement (doi:10.3390/ijms242216417), 2023-11-16
Supplement: s1 [file s1]

# Identification of 13 Novel Loci in A Genome-Wide Association Study on Taiwanese with Hepatocellular Carcinoma

## Table of contents

|                  |    |
|------------------|----|
| Fig S1.....      | 1  |
| Fig S2.....      | 2  |
| Fig S3.3.....    | 3  |
| Fig S4.....      | 16 |
| Fig S5. ....     | 17 |
| Fig S6. ....     | 18 |
| Fig S5. ....     | 19 |
| Table S1.....    | 20 |
| Table S2.....    | 20 |
| Table S3.....    | 20 |
| Table S4.....    | 21 |
| Table S6         |    |
| Table S6.1.....  | 22 |
| Table S6.2.....  | 22 |
| Table S7         |    |
| Table S7.1.....  | 23 |
| Table S7.2.....  | 23 |
| Table S7.3.....  | 24 |
| Table S7.4.....  | 24 |
| Table S7.5.....  | 25 |
| Table S7.6.....  | 26 |
| Table S7.7.....  | 27 |
| Table S7.8.....  | 28 |
| Table S7.9.....  | 28 |
| Table S7.10..... | 29 |

|                  |    |
|------------------|----|
| Table S7.11..... | 29 |
| Table S7.12..... | 30 |
| Table S7.13..... | 30 |
| Table S7.14..... | 30 |
| Table S7.15..... | 31 |
| Table S7.16..... | 31 |
| Table S7.17..... | 32 |
| Table S7.18..... | 32 |
| Table S7.19..... | 33 |
| Table S7.20..... | 34 |
| Table S7.21..... | 34 |
| Table S7.22..... | 35 |
| Table S7.23..... | 35 |
| Table S7.24..... | 36 |
| Table S8         |    |
| Table S8.1.....  | 37 |
| Table S8.2.....  | 37 |
| Table S8.3.....  | 38 |
| Table S9.....    | 38 |
| Table S10.....   | 38 |

**Fig S1. Regional plots and R-square of linkage disequilibrium for 13 novel loci.** The blue solid line shows the recombination rate, the gray horizontal dash line indicates a significant threshold ( $p = 5e - 08$ ), and the LD score with the target variant is colored on each variant. (A) rs187199523. (B) rs140233124. (C) rs144285059. (D) rs148610742. (E) rs118180127. (F) rs117719091. (G) rs17155112. (H) rs77404202. (I) rs144225287. (J) rs150098717. (K) rs74333160. (L) rs80115676. (M) rs61404501.

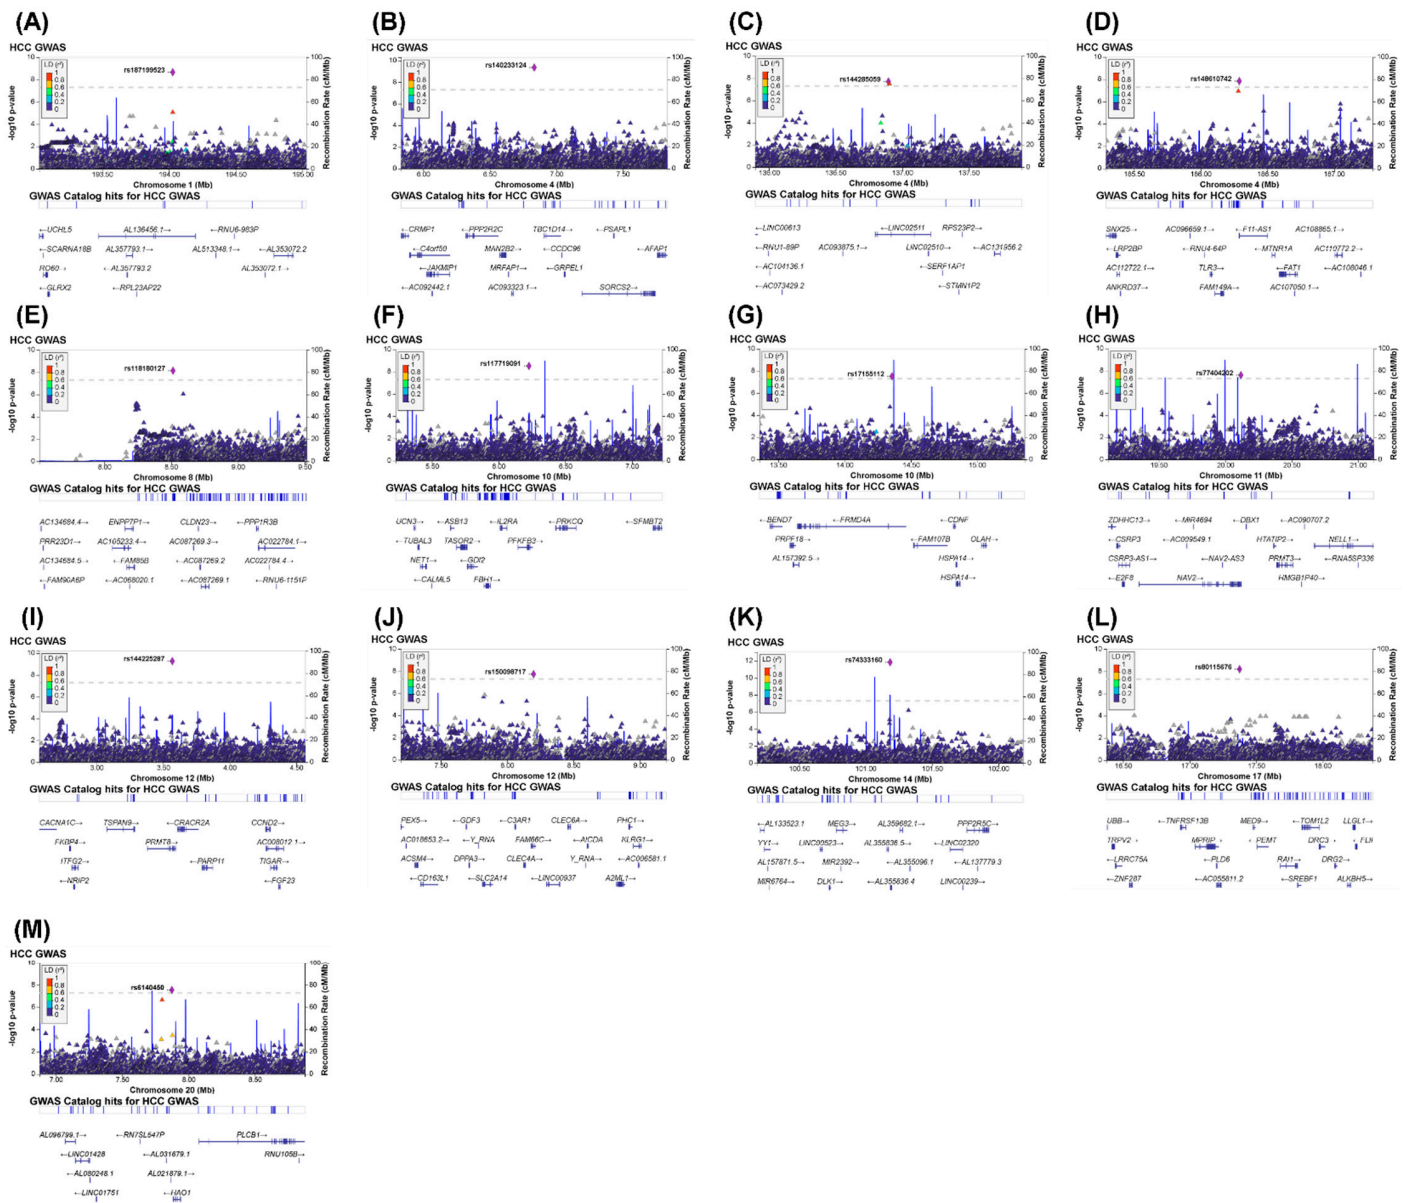

**Figure S2. Results of the GWAS for Taiwanese patients with HCC in another cohort.** Manhattan plot adjusted by sex and age and QQ-plot in another cohort in Taiwanese.

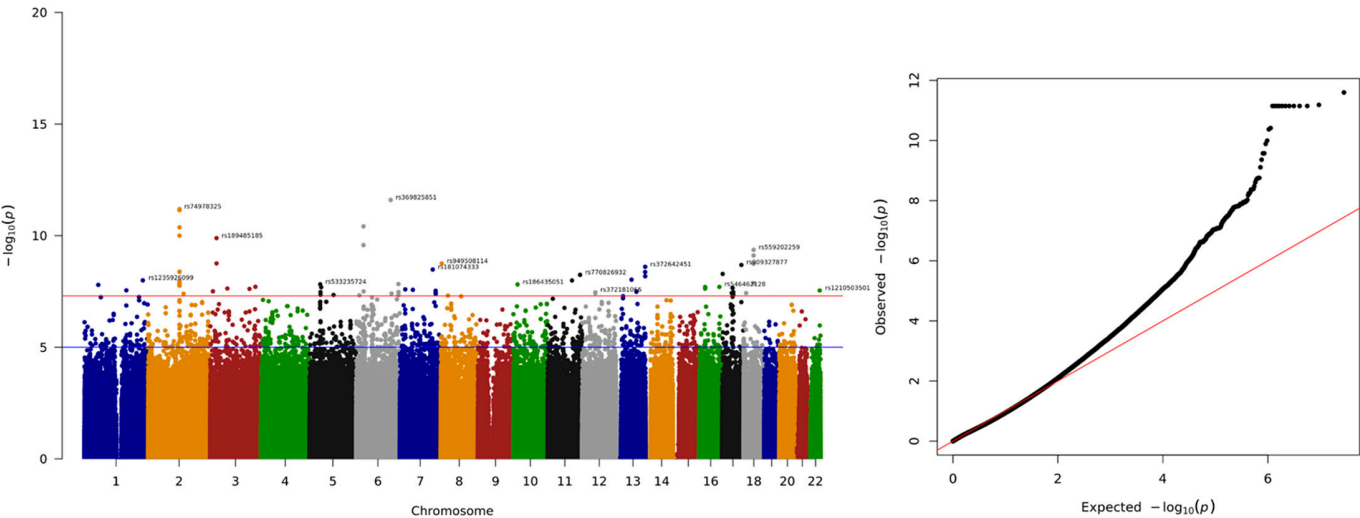



**Figure S3. PheWAS Manhattan plot for 13 novel loci in Taiwanese with HCC.** The negative log of the p-value is plotted for each of 1,791 disease phenotypes or “phecodes” in CMUH. Each color represents a disease category as defined on the x-axis. (A) rs187199523. (B) rs140233124. (C) rs144285059. (D) rs148610742. (E) rs118180127. (F) rs117719091. (G) rs17155112. (H) rs77404202. (I) rs144225287. (J) rs150098717. (K) rs74333160. (L) rs80115676. (M) rs61404501.

(A)

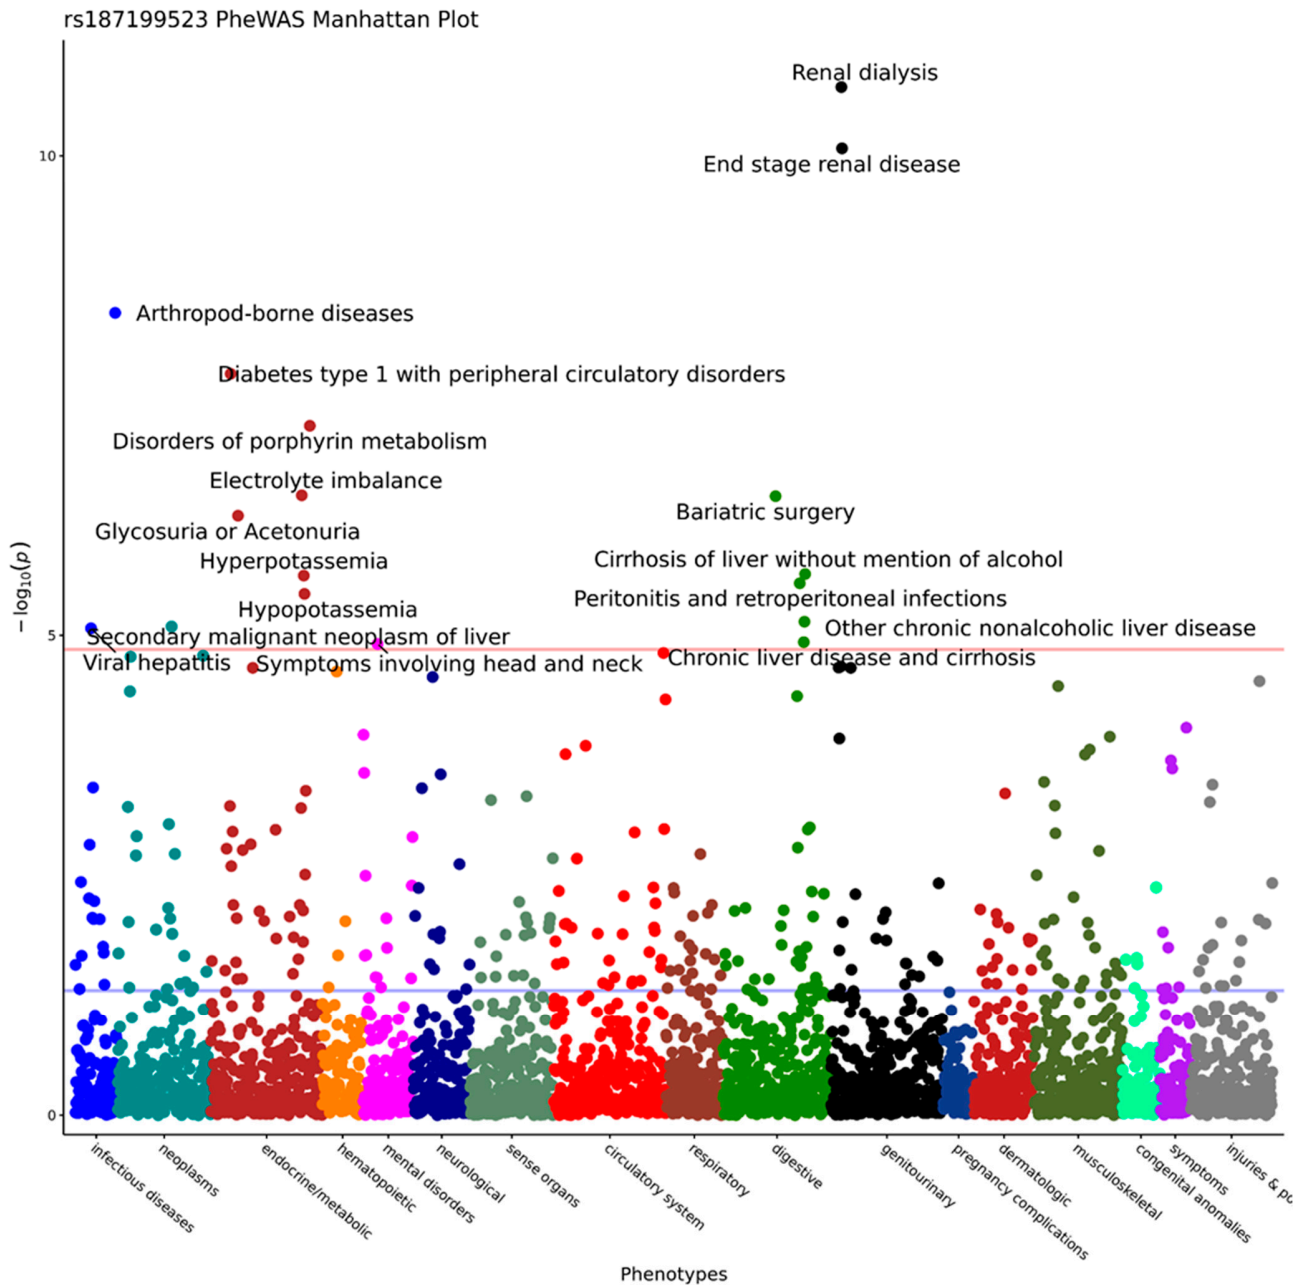

(B)

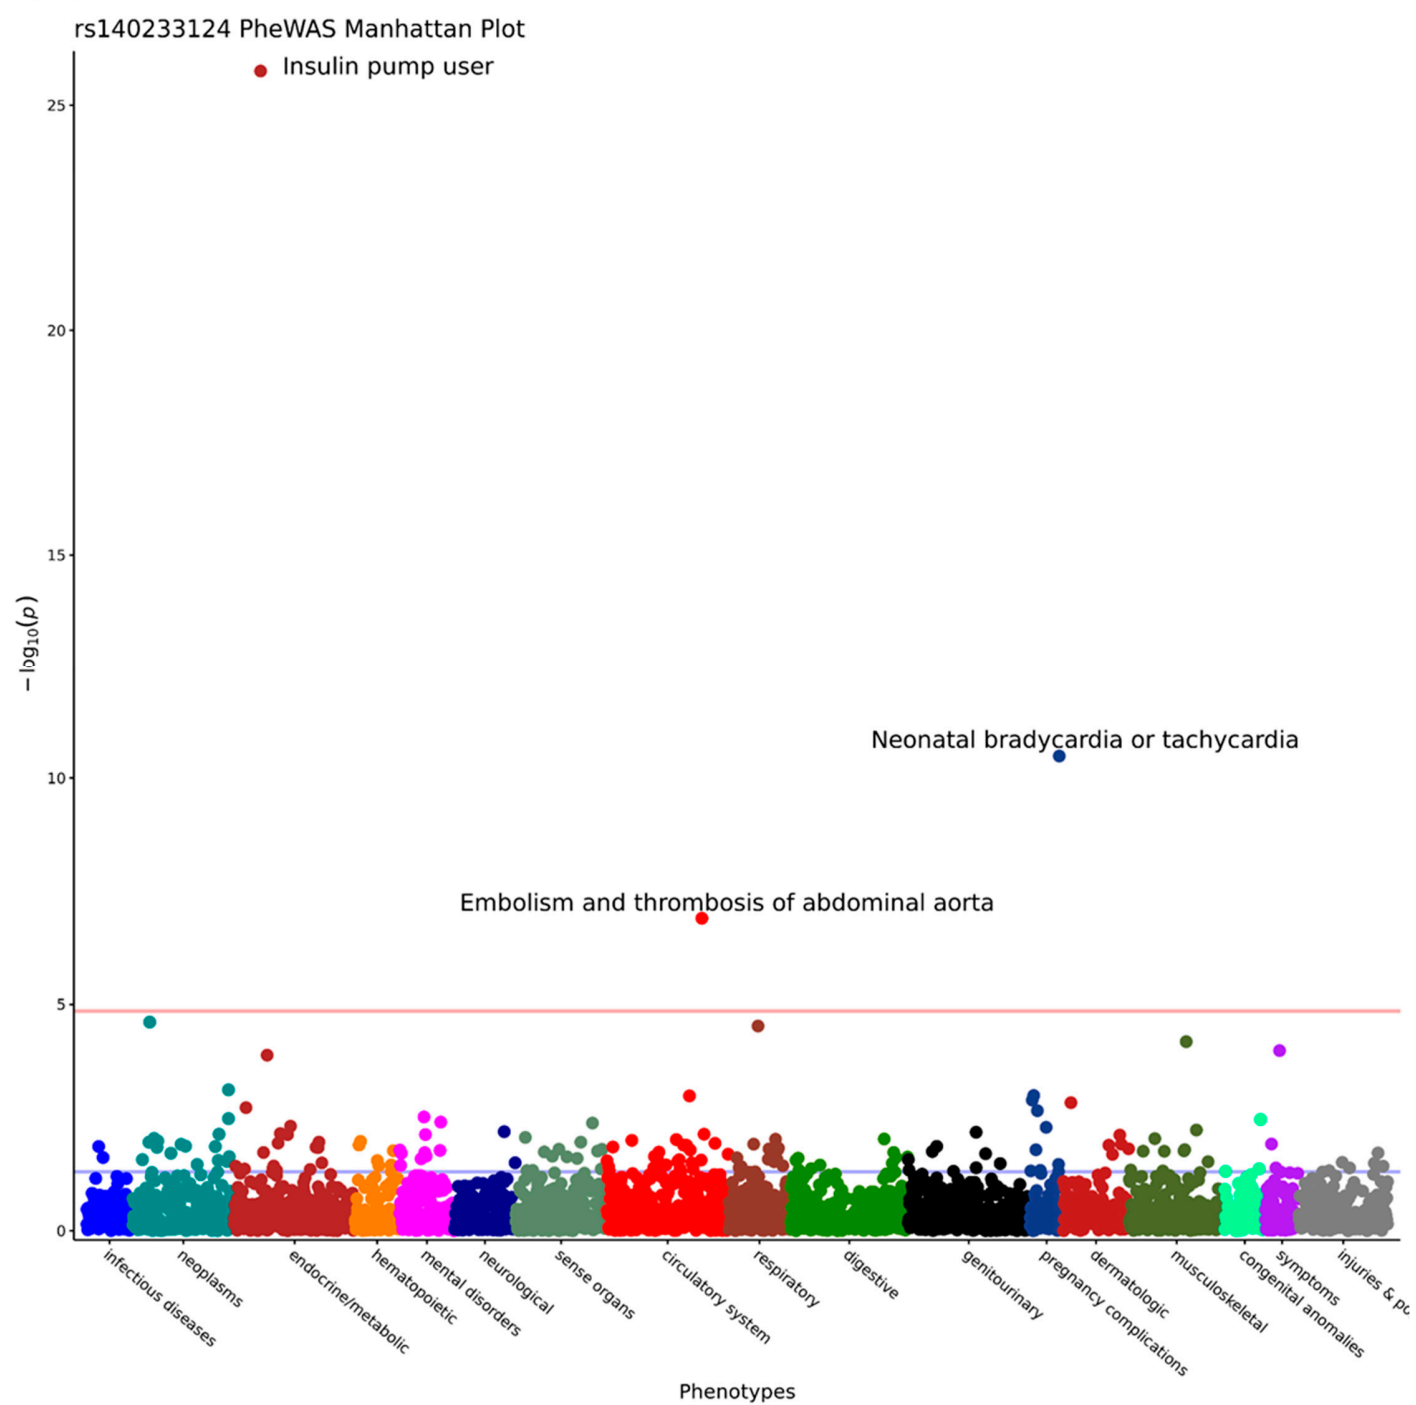

(C)

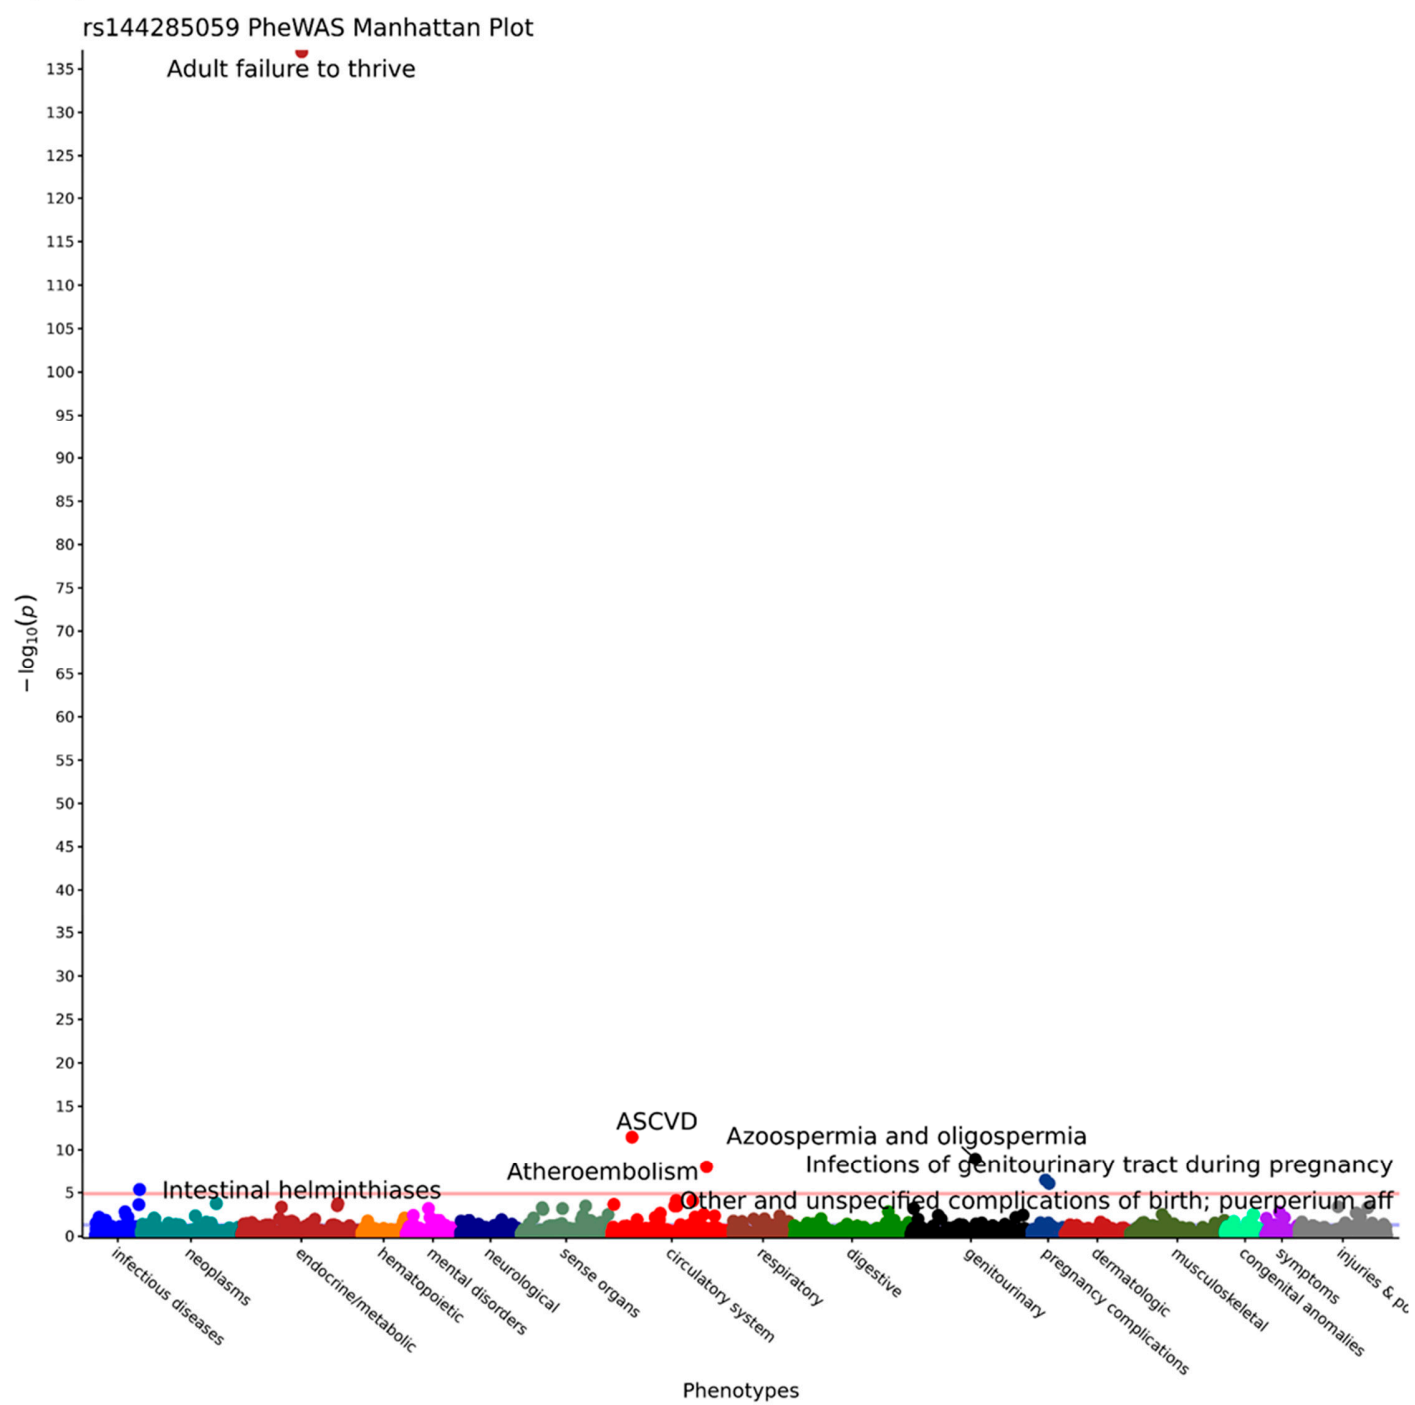

(D)

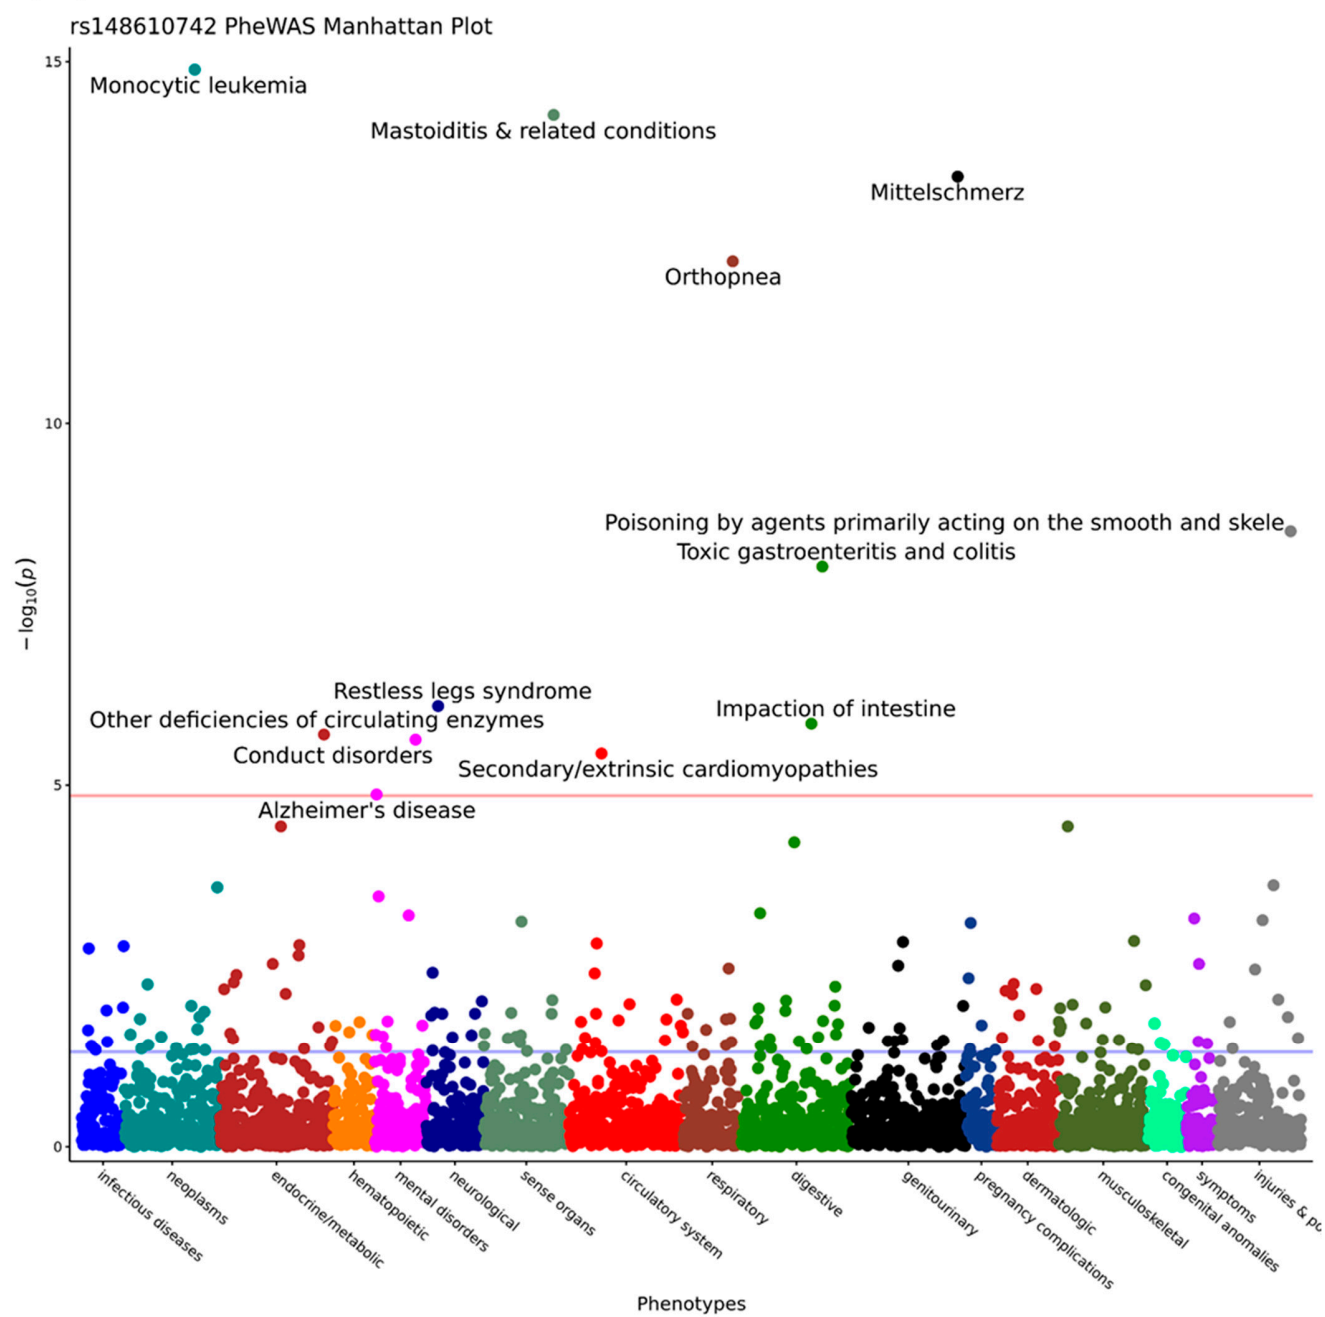

(E)

rs118180127 PheWAS Manhattan Plot

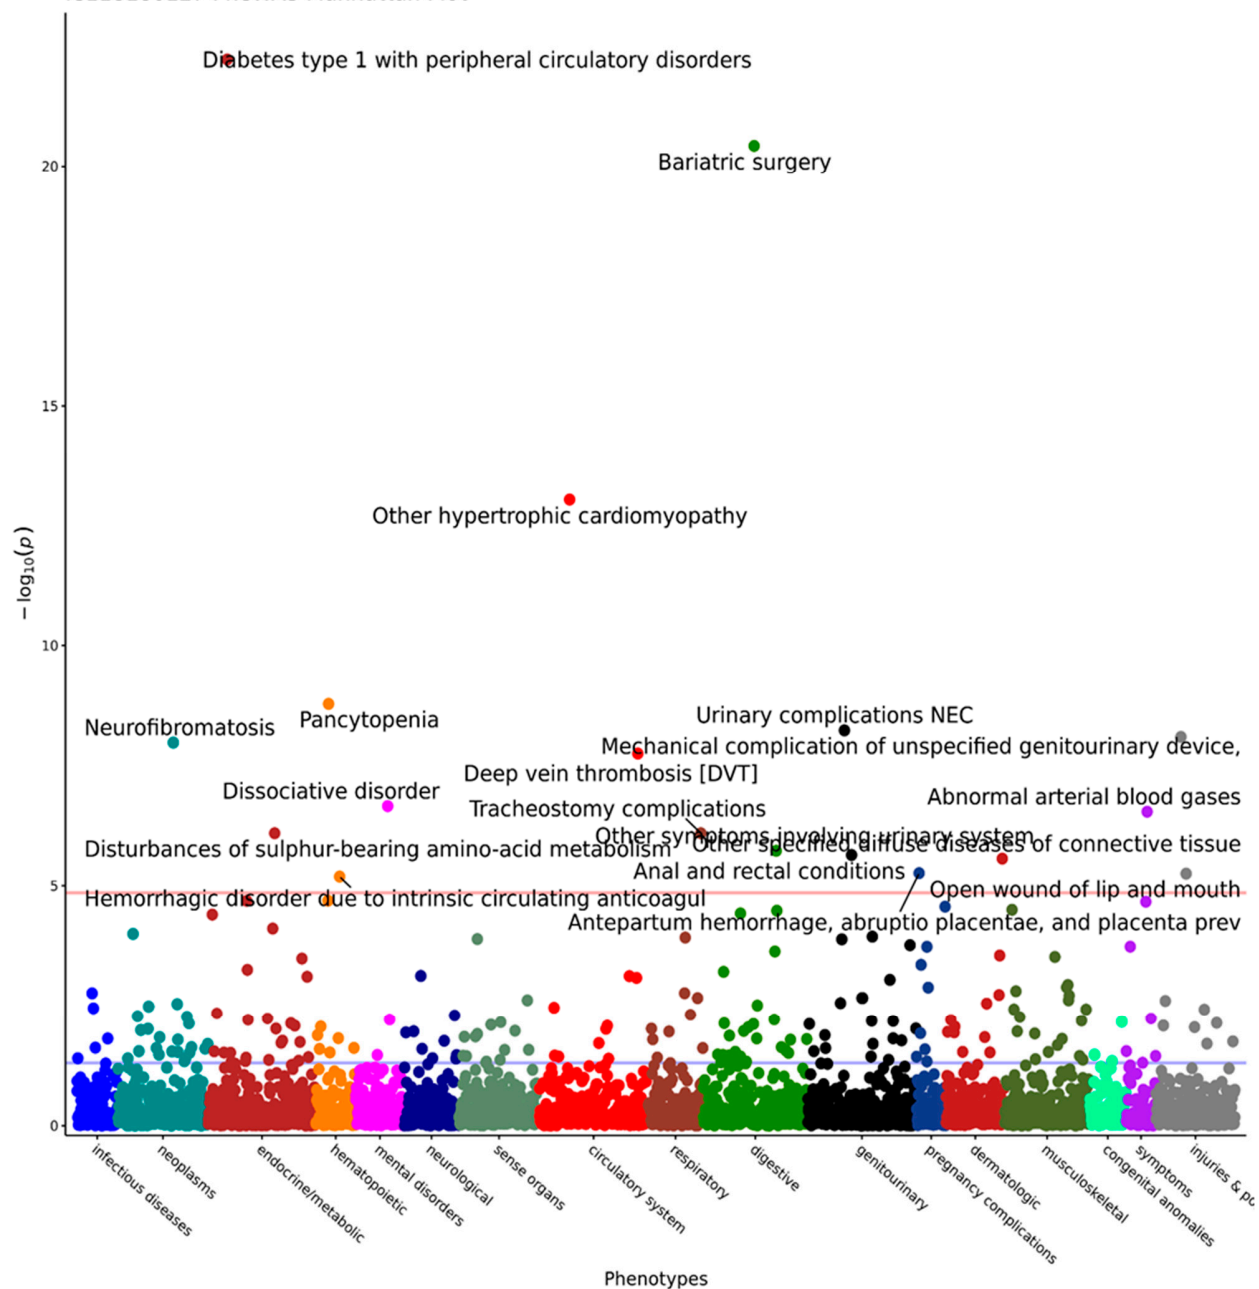

(F)

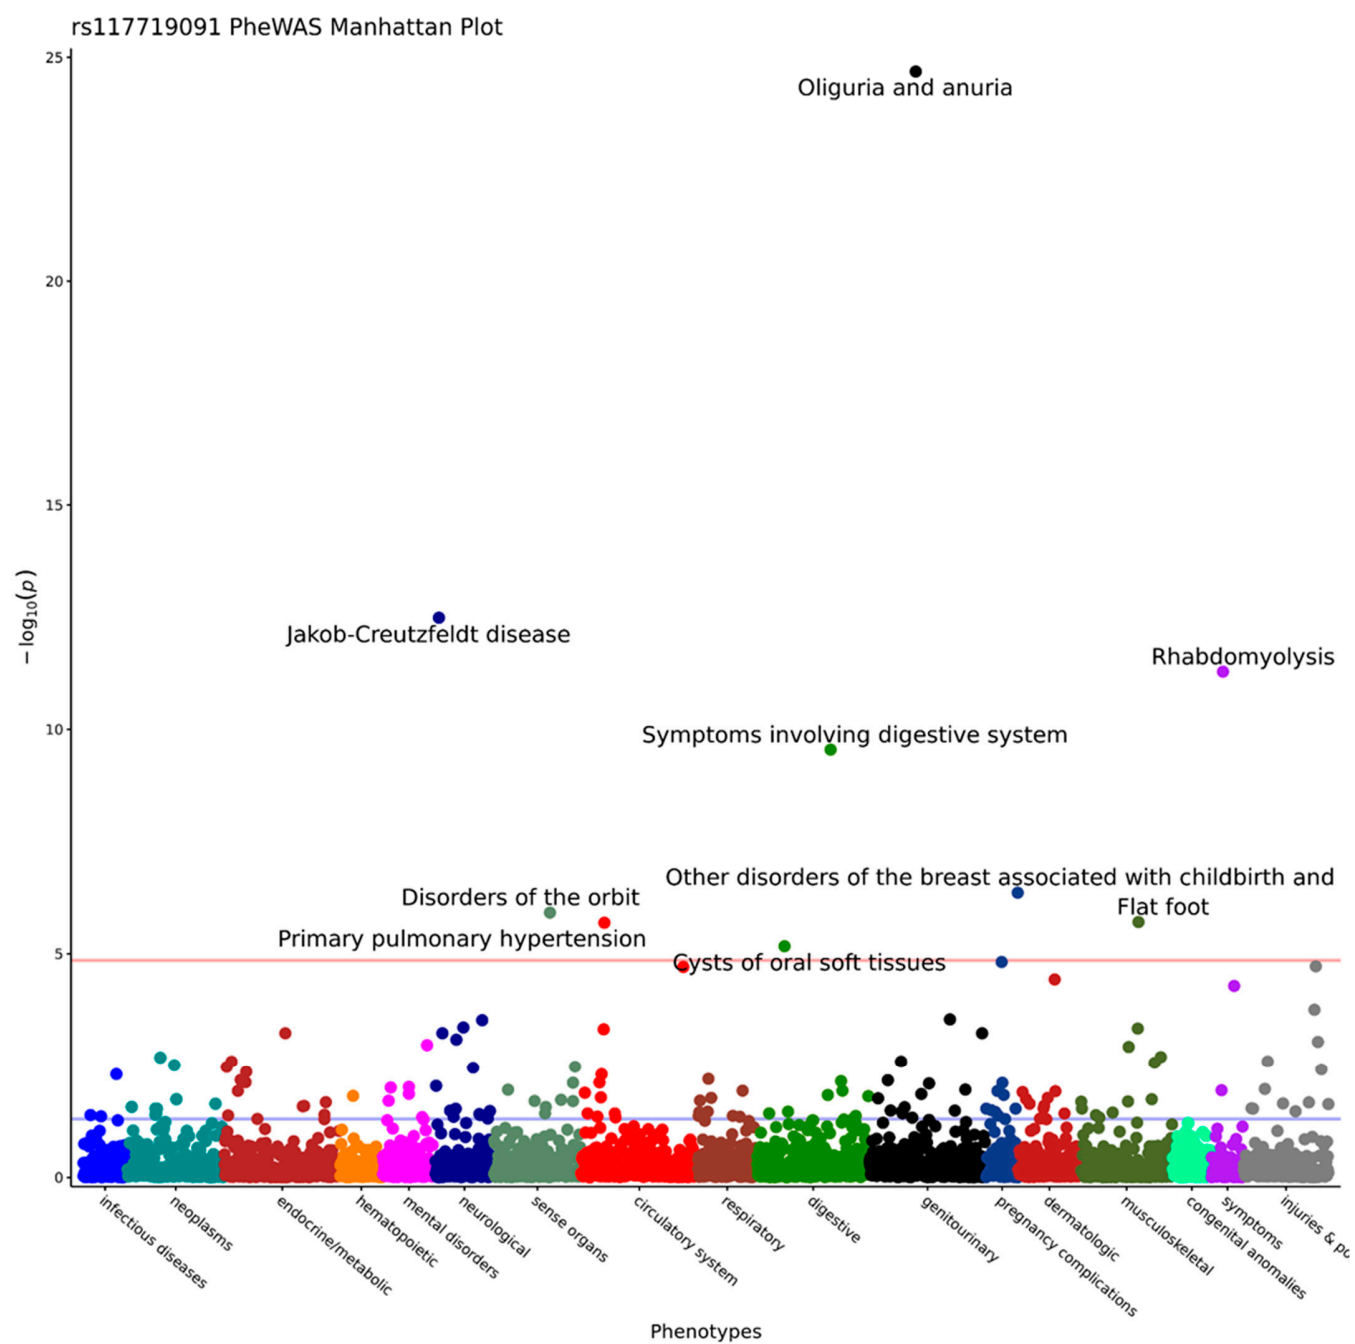

(G)

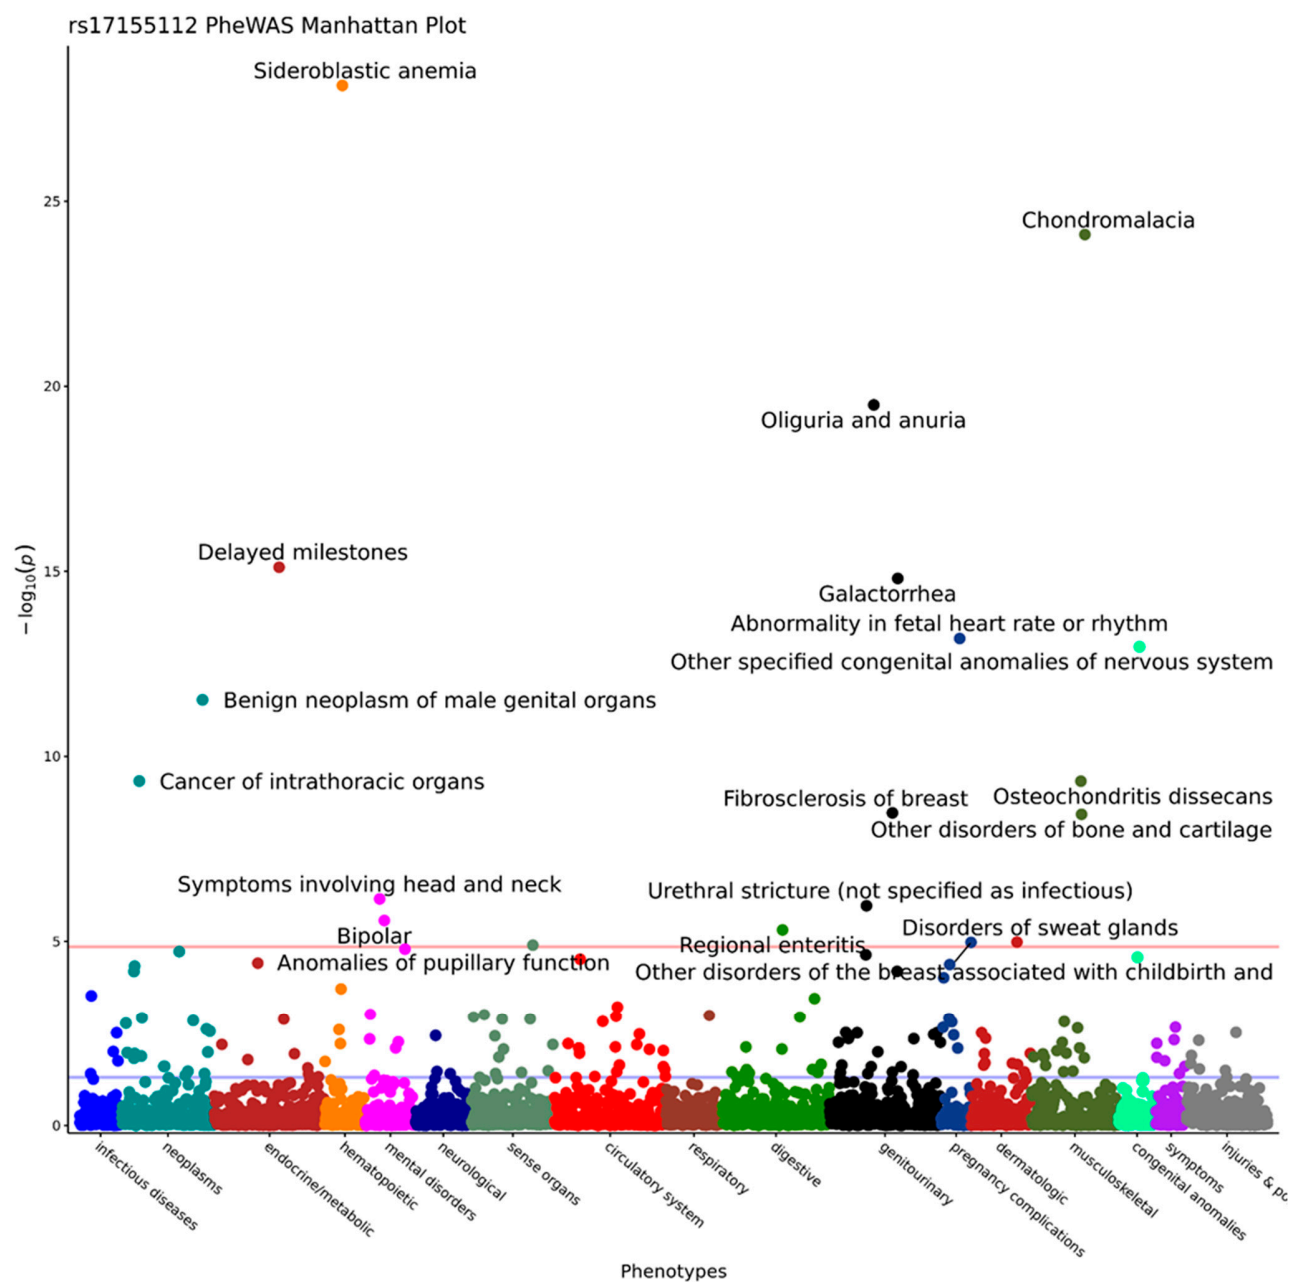

(H)

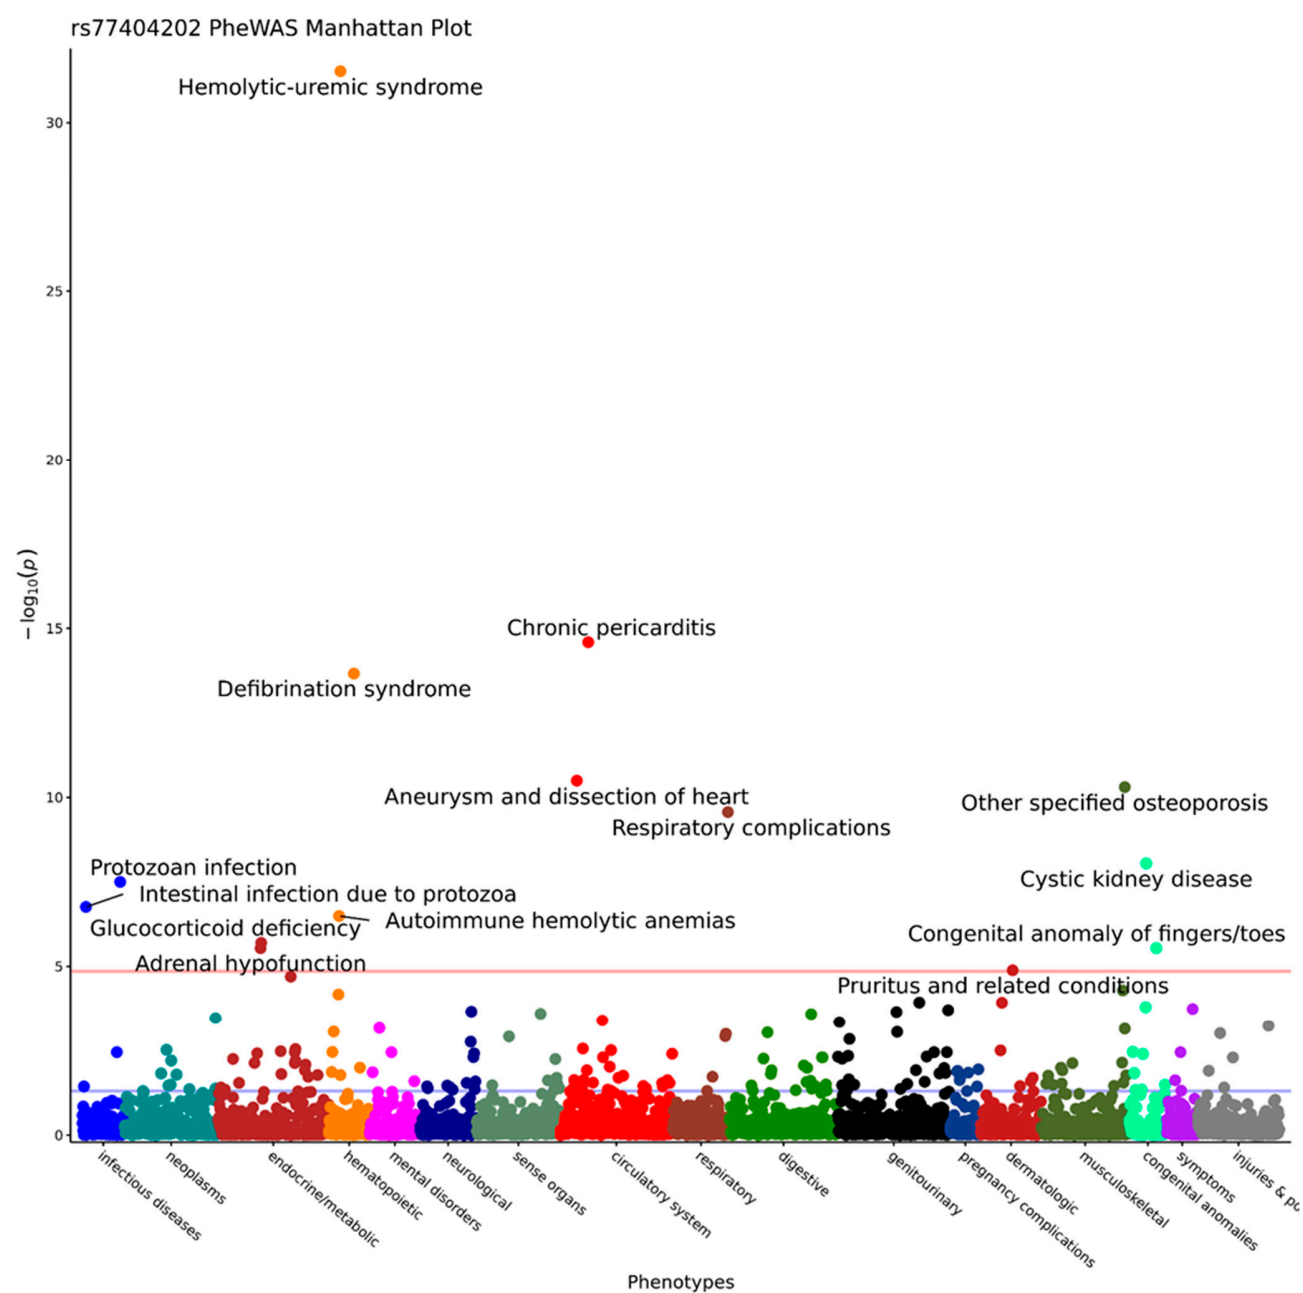



(I)

rs144225287 PheWAS Manhattan Plot

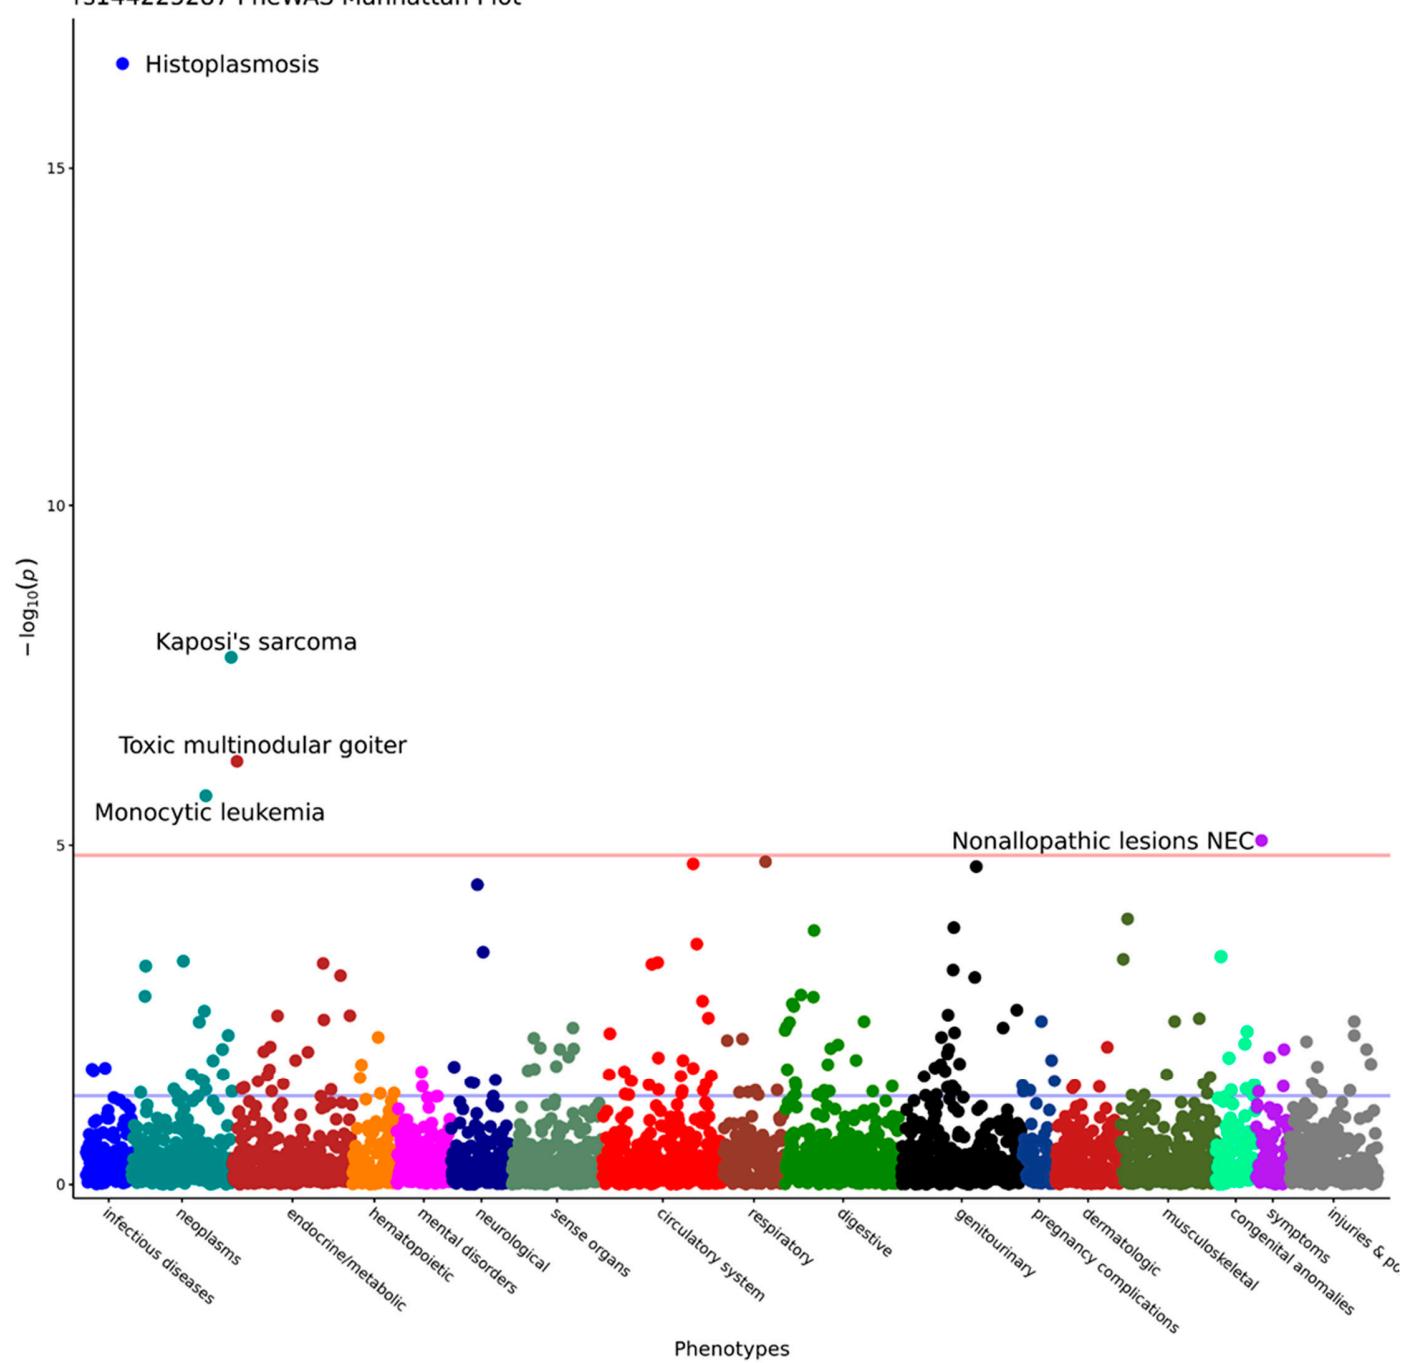

(J)

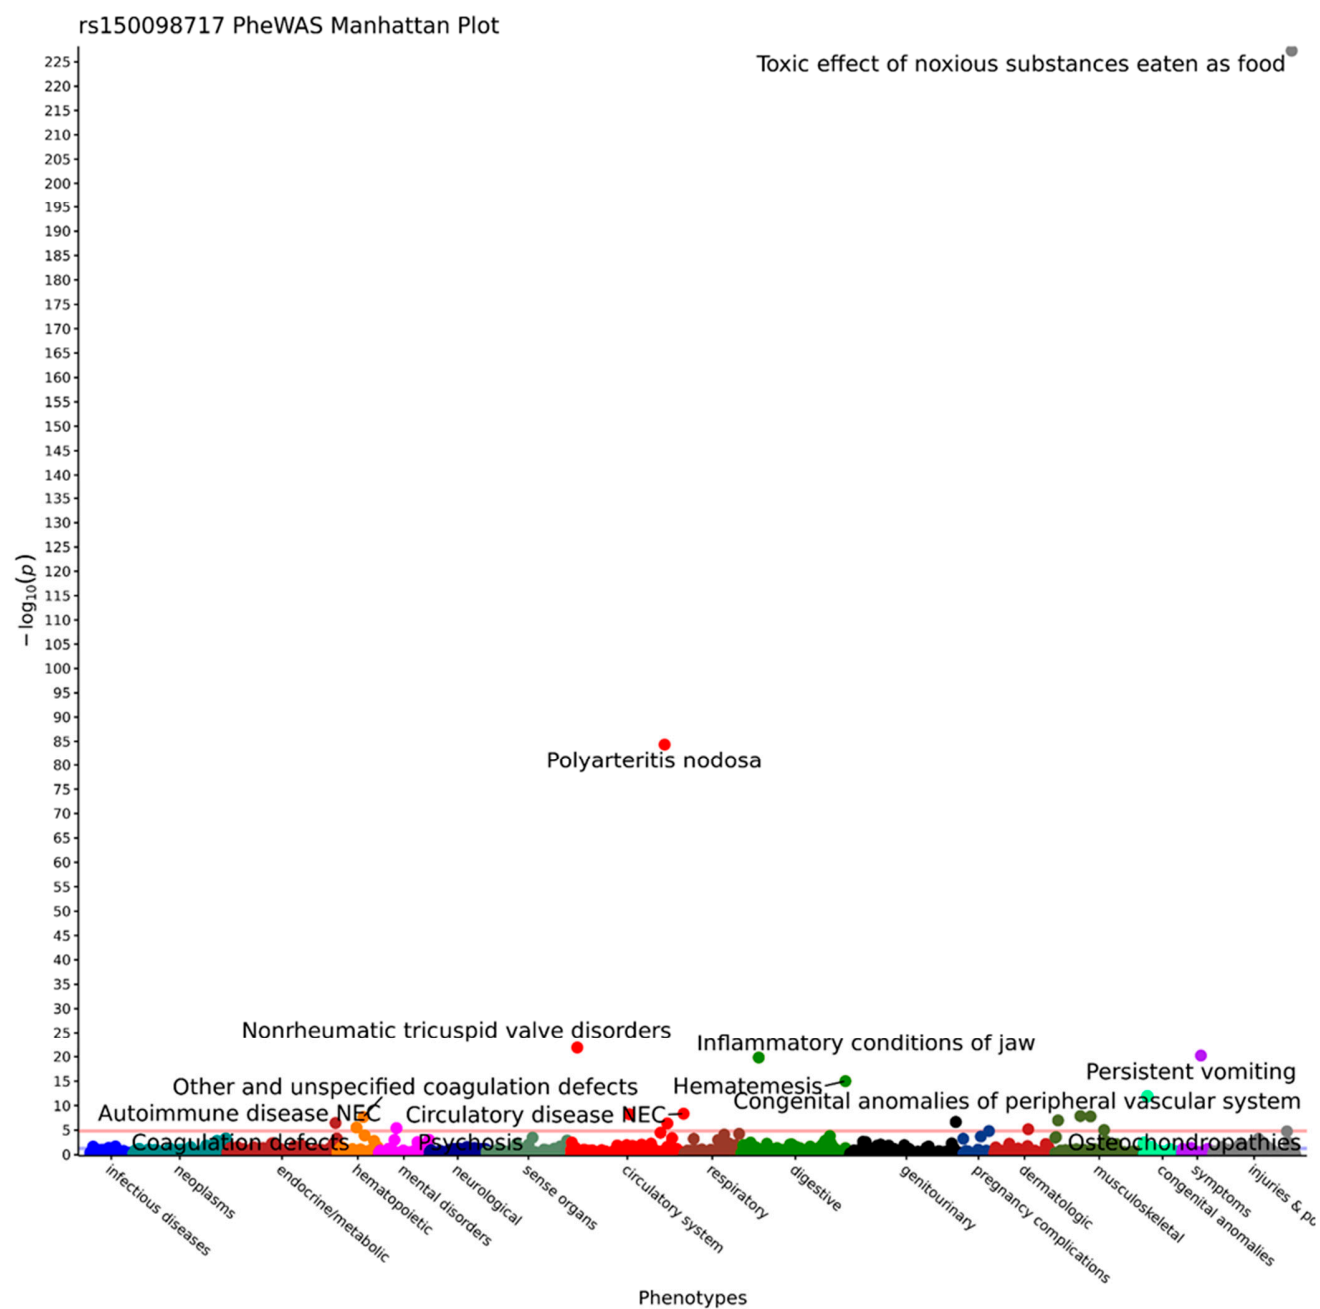

(K)

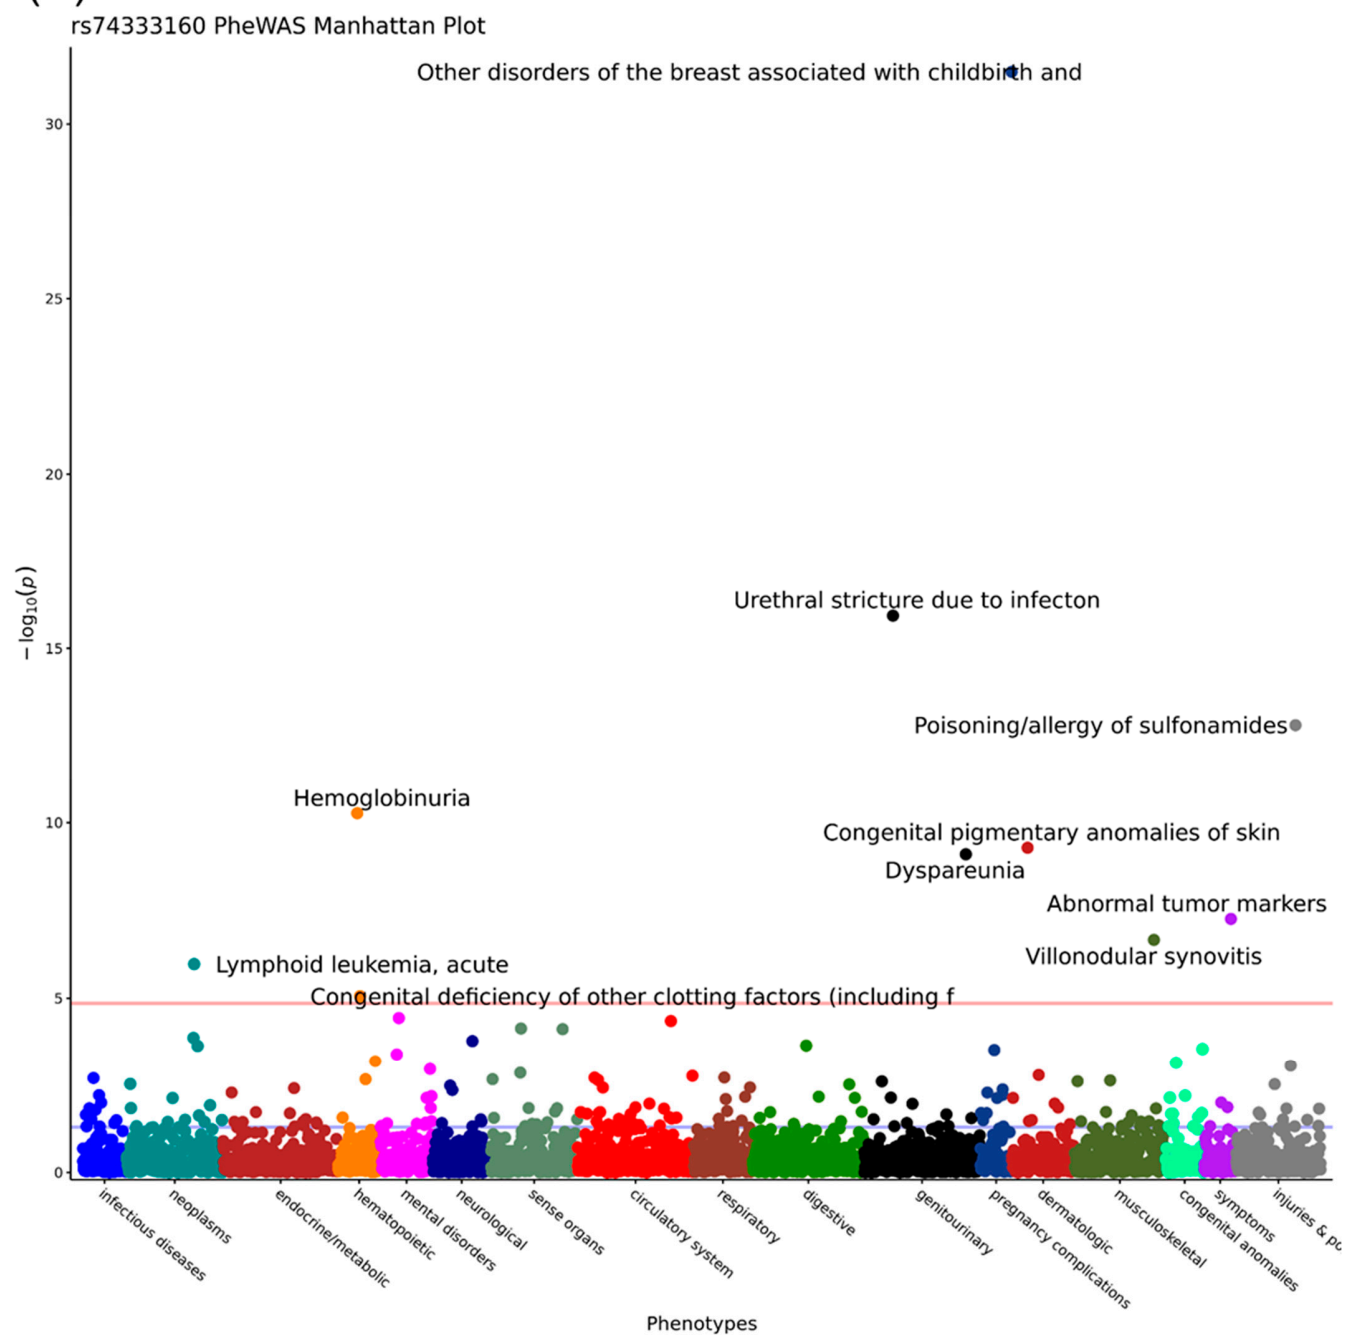

(L)

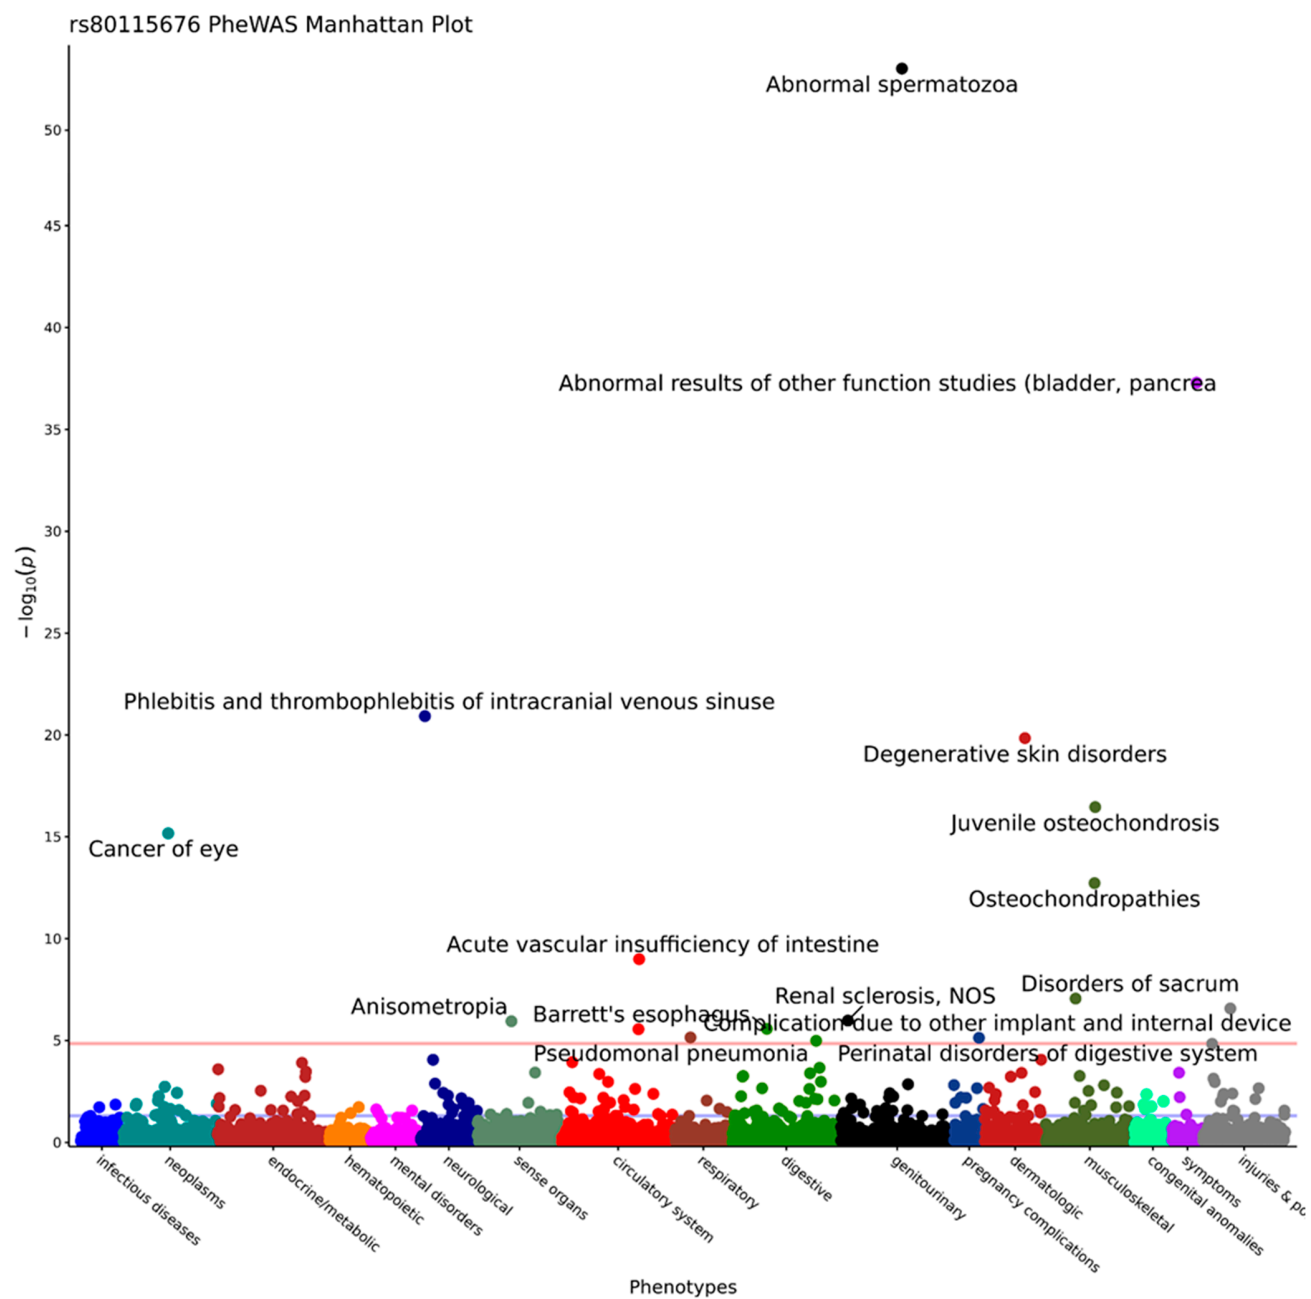

(M)

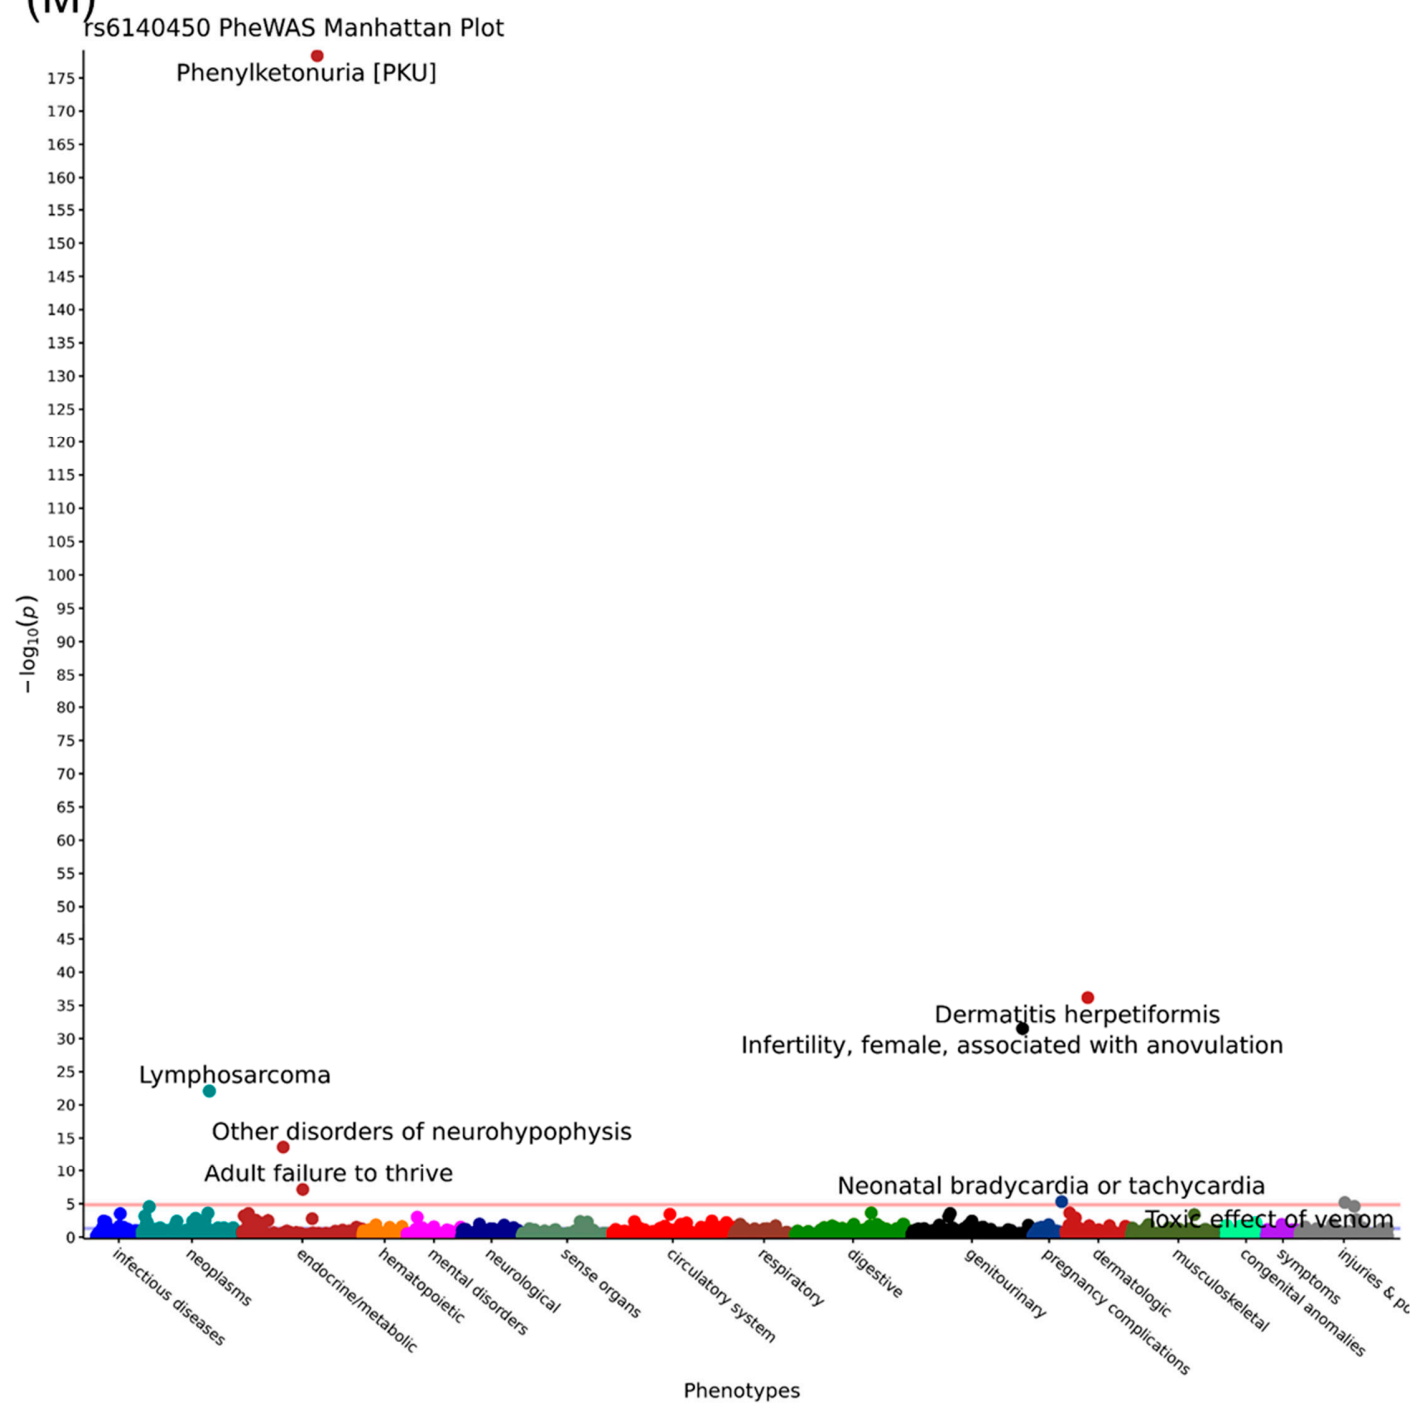

**Figure S4. Expression of five novel loci-related 6 genes and survival in other cohorts.** The related genes that exhibited different expression in tumor and adjacent normal tissues were validated in our study by using the TCGA-LIHC dataset. The red box depicts the tumor tissue, and the green box depicts the normal tissue. Survival analysis of middle and bottom panels were conducted from TCGA-LIHC and GEO data, respectively. (A) *F11*. (B) *F11-AS1*. (C) *FRMD4A*. (D) *KIAA0232*. (D) *LINC02511*. (E) *PFKFB3*.

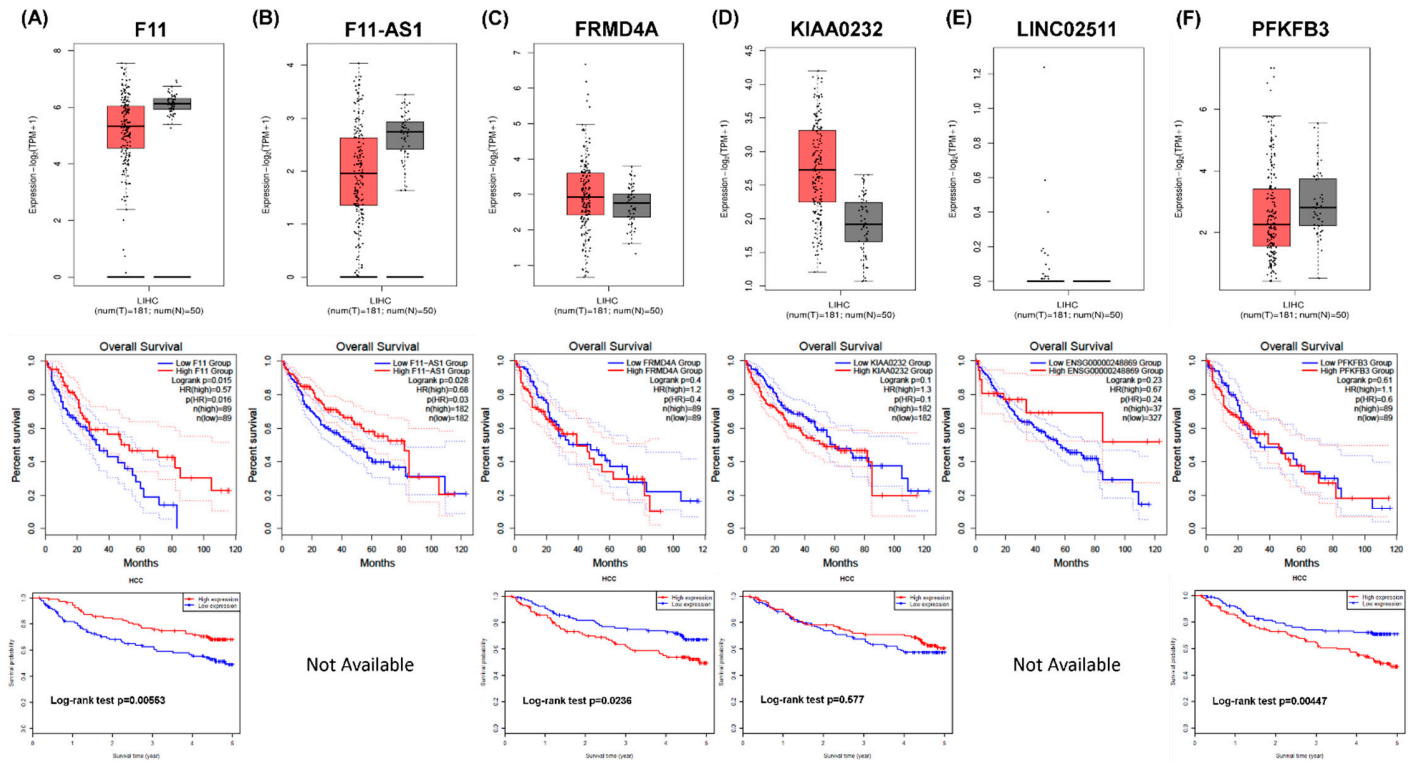

**Figure S5. Results of the analysis of the expression and somatic mutations of 13 novel loci-related genes by using the TCGA-LIHC cohort. (A) Results of the somatic mutations of 12 loci related genes. (B) Results of differential expression between HCC and noncancerous liver tissues.**

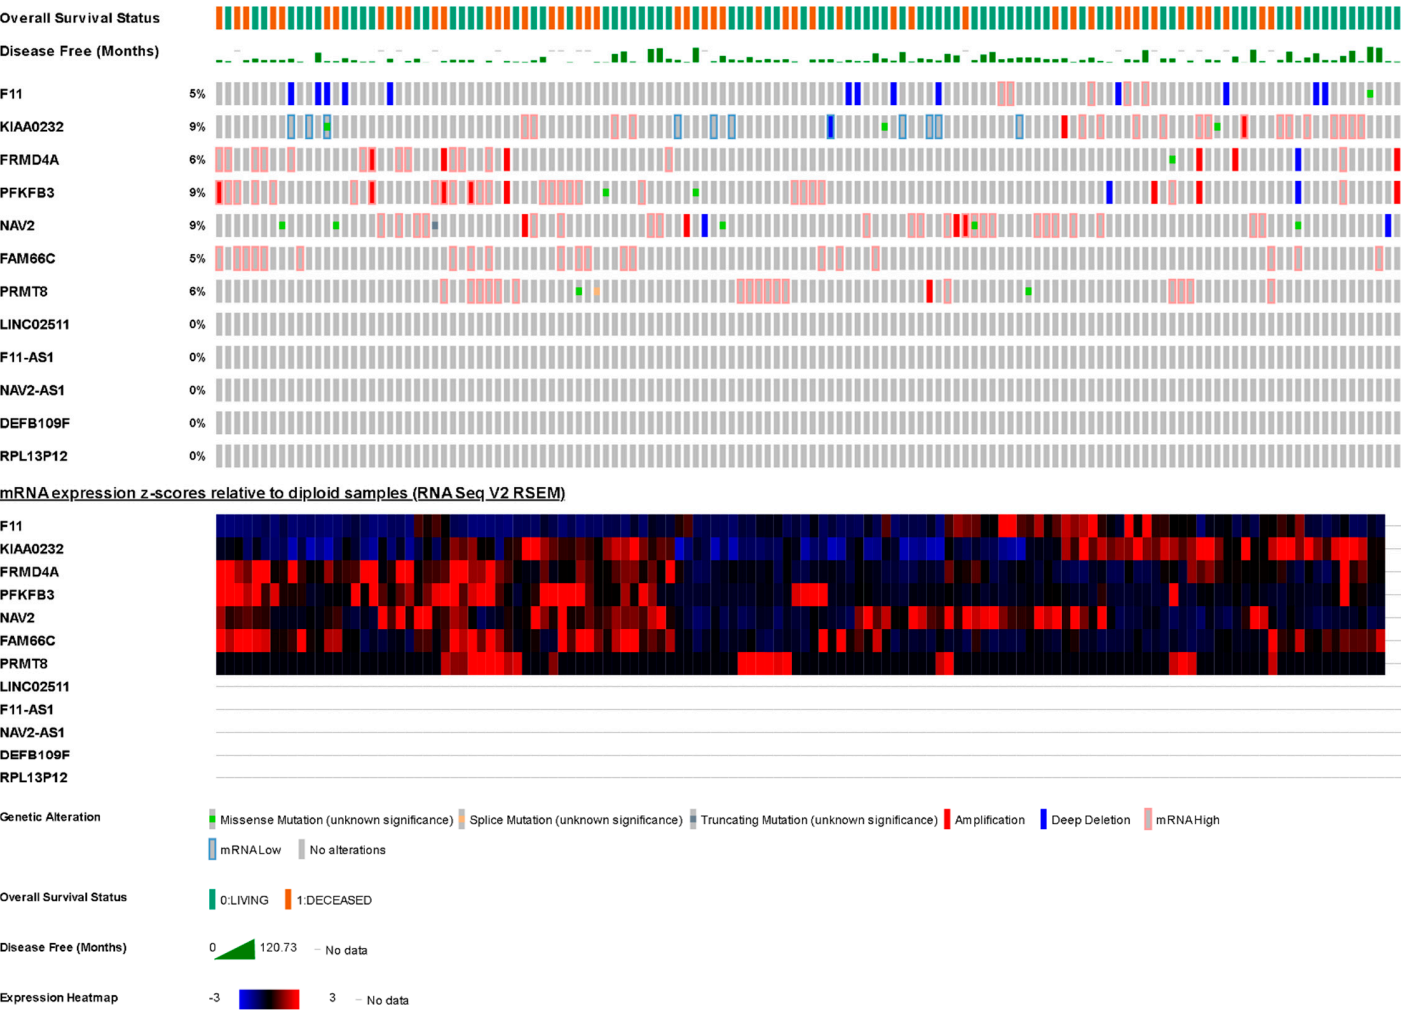

**Figure S6. Results of the performance for top 5%, 10%, 15%, and 20% PRS only, clinical data only, or combined both to predict HCC risk. (A) ROC curve of top 5% of both extremes. (B) ROC curve of the top 10% of both extremes. (C) ROC curve of the top 15% of both extremes. (D) ROC curve of the top 20% of both extremes. Demographic factors (age, sex, and BMI) and bioclinical data (albumin, HBV surface antigen, and HCV antibody) were used in model building. Combine means both the PRS and clinical data were used in model building.**

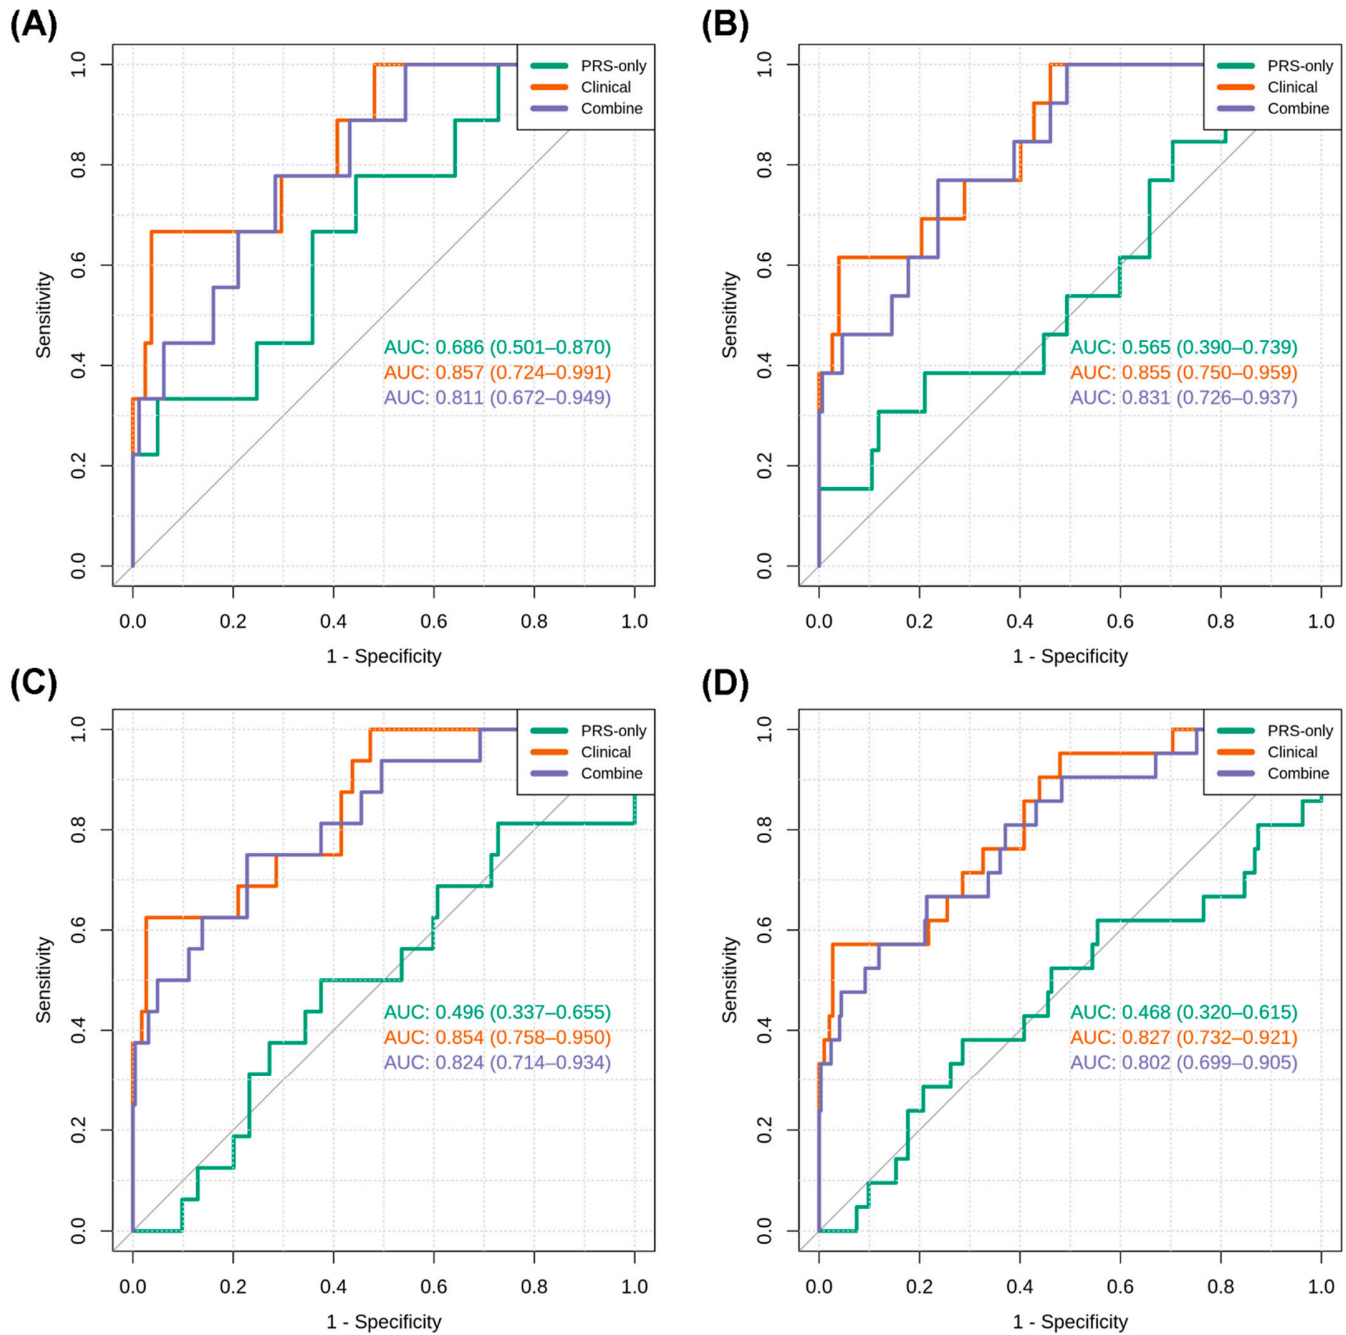



Figure S7. PheWAS Manhattan plot for HCC PRS in Taiwanese with HCC

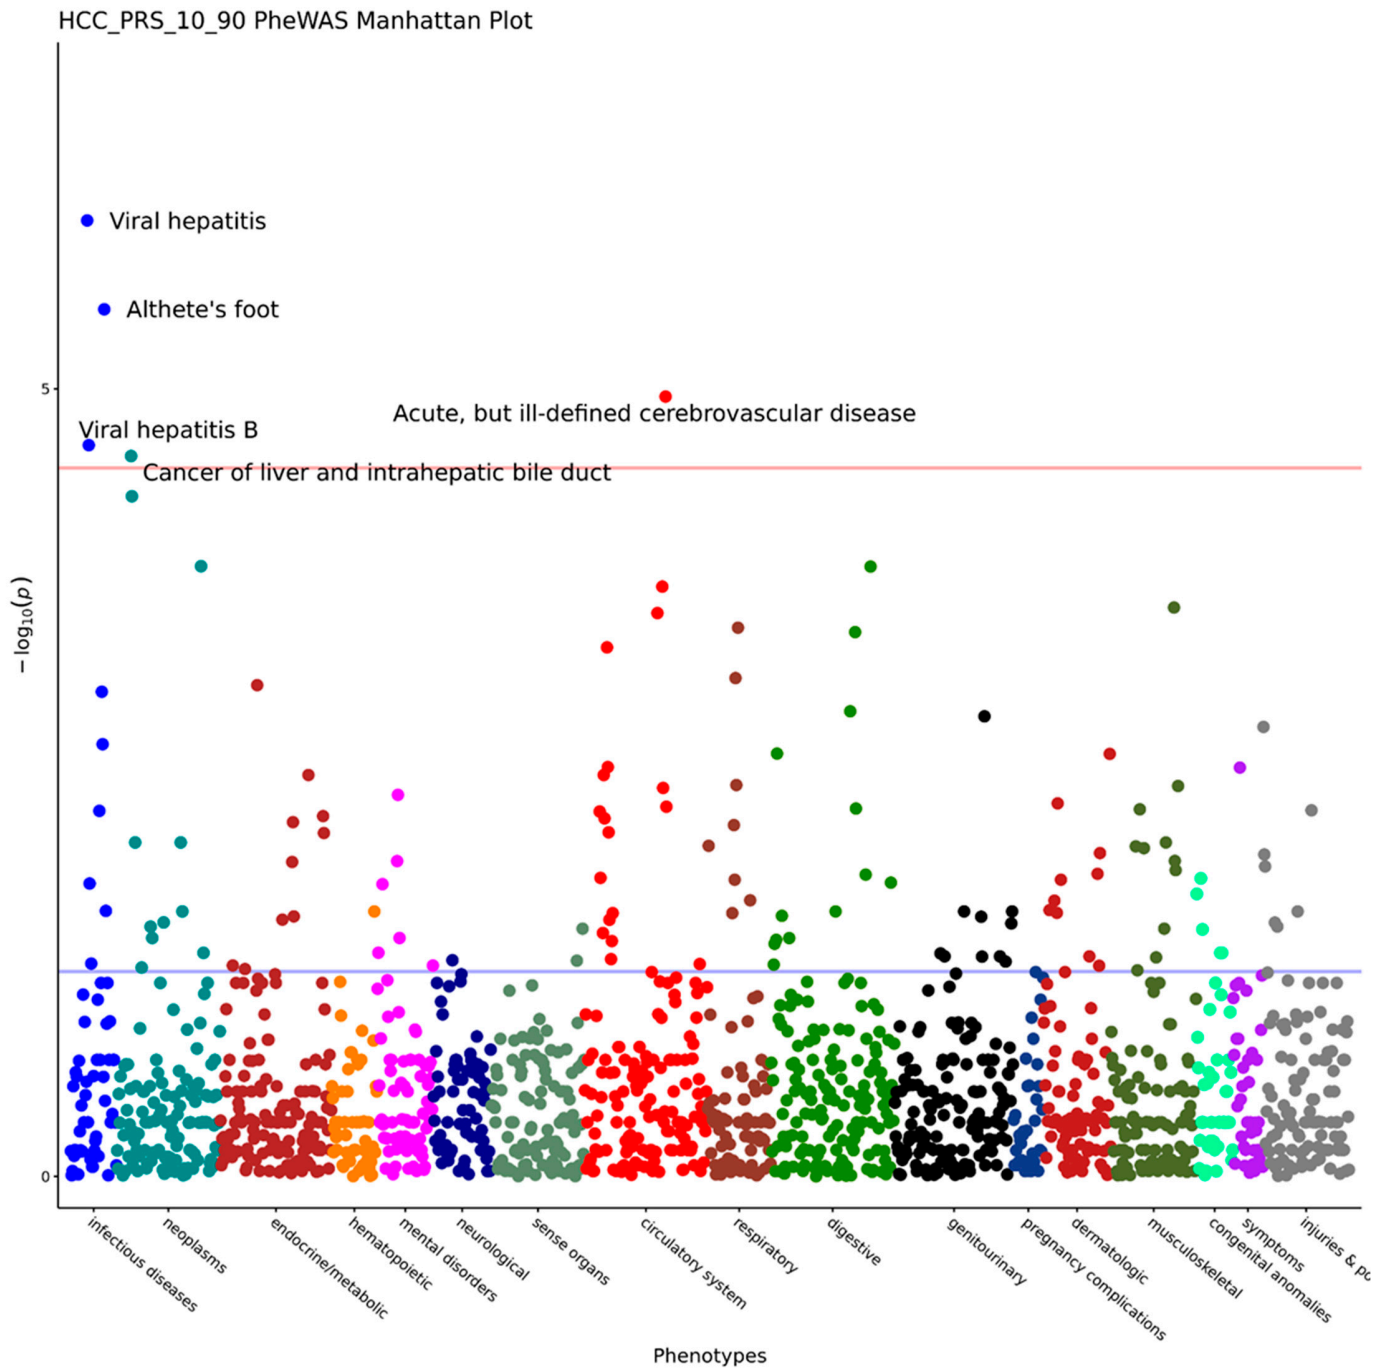

**Table S1. Variants were significant in our discovery GWAS but not in other studies, and the results of the meta-analysis by using the UK Biobank and BBJ cohort were shown.** Abbreviations: Chr, chromosome; RA, reference allele; EA, effect allele; AF, allele frequency; PAF, publish allele frequency; OR, odds ratio; CI, confidence interval; MA, meta-analysis; MAF, minor allele frequency.

**This table is shown in Supplementary\_Table\_S1.xlsx**

**Table S2. Variants were not significant in our discovery GWAS but significant after performing a meta-analysis by using data from the UK Biobank and BBJ cohort.** Abbreviations: Chr, chromosome; RA, reference allele; EA, effect allele; AF, allele frequency; PAF, publish allele frequency; OR, odds ratio; CI, confidence interval; MA, meta-analysis; MAF, minor allele frequency.

**The table is shown in Supplementary\_Table\_S2.xlsx**

**Table S3. Variants were significant in our study and other previous studies.** Abbreviations: Chr, chromosome; RA, reference allele; EA, effect allele; AF, allele frequency; PAF, publish allele frequency; OR, odds ratio; CI, confidence interval; MA, meta-analysis; MAF, minor allele frequency.

**The table is shown in Supplementary\_Table\_S3.xlsx**

**Table S4. Summary statistics of 13 novel SNPs in another independent cohort in Taiwanese**

| CHR | SNP         | BP       | A1 | F_A     | F_U     | A2 | P       | OR     | SE      | L95    | U95   | MAF     | NCHROBS |
|-----|-------------|----------|----|---------|---------|----|---------|--------|---------|--------|-------|---------|---------|
| 1   | rs187199523 | 1.94E+08 | T  | 0.02054 | 0.01785 | A  | 0.3548  | 1.154  | 0.1646  | 0.8359 | 1.593 | 0.01804 | 602952  |
| 4   | rs144285059 | 1.37E+08 | GA | 0.02965 | 0.02065 | G  | 0.01009 | 1.449  | 0.1415  | 1.098  | 1.912 | 0.02124 | 574682  |
| 4   | rs148610742 | 1.86E+08 | T  | 0.01482 | 0.01164 | C  | 0.2077  | 1.277  | 0.1947  | 0.8716 | 1.87  | 0.01154 | 594484  |
| 8   | rs118180127 | 8513430  | A  | 0.05118 | 0.05448 | T  | 0.5319  | 0.9361 | 0.103   | 0.765  | 1.146 | 0.05502 | 637032  |
| 10  | rs117719091 | 6227313  | T  | 0.03941 | 0.04448 | C  | 0.2829  | 0.8812 | 0.1166  | 0.7011 | 1.108 | 0.04397 | 637032  |
| 10  | rs17155112  | 14357172 | A  | 0.01226 | 0.01164 | G  | 0.7054  | 1.054  | 0.2106  | 0.6975 | 1.592 | 0.01165 | 614518  |
| 11  | rs77404202  | 20117743 | T  | 0.04964 | 0.04412 | C  | 0.2349  | 1.132  | 0.1046  | 0.922  | 1.389 | 0.04336 | 637032  |
| 12  | rs150098717 | 8198462  | T  | 0.04299 | 0.03885 | C  | 0.3326  | 1.111  | 0.112   | 0.8923 | 1.384 | 0.03815 | 637032  |
| 14  | rs74333160  | 1.01E+08 | G  | 0.06807 | 0.06215 | T  | 0.2693  | 1.102  | 0.09016 | 0.9236 | 1.315 | 0.06193 | 637032  |
| 17  | rs80115676  | 17375355 | G  | 0.05169 | 0.05193 | A  | 0.9796  | 0.995  | 0.1025  | 0.8139 | 1.216 | 0.05154 | 637032  |
| 4   | rs140233124 | 6834347  | -  | NA      |         |    |         |        |         |        |       |         |         |
| 12  | rs144225287 | 3568611  | -  | NA      |         |    |         |        |         |        |       |         |         |
| 20  | rs6140450   | 7873320  | C  | NA      |         |    |         |        |         |        |       |         |         |

**Table S5. PheWAS Results in Taiwanese with HCC. (A) rs187199523. (B) rs140233124. (C) rs144285059. (D) rs148610742. (E) rs118180127. (F) rs117719091. (G) rs17155112. (H) rs77404202. (I) rs144225287. (J) rs150098717. (K) rs74333160. (L) rs80115676. (M) rs61404501.**

**This table is shown in Supplementary\_Table\_S5.xlsx**

**Table S6.1. Differential gene expression of novel loci related genes between the noncancerous and cancerous tissues of Taiwanese patients with HCC.** The 16 novel loci-related genes were retrieved; 9 genes are shown in the table below, and the other 7 genes were removed because their alignment read count was too low. Abbreviations: logFC, log fold change; logCPM, log of count per million.

| <i>ENSGID</i>   | <i>Gene</i> | <i>logFC</i> | <i>logCPM</i> | <i>F</i> | <i>PValue</i> | <i>FDR</i> |
|-----------------|-------------|--------------|---------------|----------|---------------|------------|
| ENSG00000170525 | PFKFB3      | -1.7038      | 5.82257       | 53.8401  | 4.46E-11      | 1.06E-09   |
| ENSG00000170871 | KIAA0232    | 0.78244      | 6.30025       | 44.2176  | 1.28E-09      | 1.85E-08   |
| ENSG00000248869 | LINC02511   | 3.5091       | -2.541        | 15.6986  | 1.34E-04      | 4.44E-04   |
| ENSG00000088926 | F11         | -0.7353      | 6.61583       | 10.4003  | 1.67E-03      | 4.14E-03   |
| ENSG00000151474 | FRMD4A      | -0.4199      | 4.95127       | 6.89554  | 9.91E-03      | 2.00E-02   |
| ENSG00000166833 | NAV2        | -0.3756      | 7.32916       | 4.20797  | 4.27E-02      | 7.15E-02   |
| ENSG00000227240 | AL136456.1  | 0.35129      | 1.36369       | 0.71478  | 4.00E-01      | 4.84E-01   |
| ENSG00000226711 | FAM66C      | 0.19011      | -0.9222       | 0.38345  | 5.37E-01      | 6.15E-01   |
| ENSG00000215030 | RPL13P12    | -0.1638      | 1.17802       | 0.37282  | 5.43E-01      | 6.21E-01   |

**Table S6.2. Survival analyses of 13 novel loci-related genes.** We used a threshold of 75 for mRNA expression to group those with high and low expression. Abbreviation: NA, not available.

| <i>ENSGID</i>   | <i>Gene</i> | <i>G1_N</i> | <i>G2_N</i> | <i>Log Rank P-val</i> |
|-----------------|-------------|-------------|-------------|-----------------------|
| ENSG00000088926 | F11         | 38          | 37          | 6.93E-01              |
| ENSG00000111218 | PRMT8*      | 61          | 14          | 2.21E-01              |
| ENSG00000151474 | FRMD4A      | 38          | 37          | 6.58E-01              |
| ENSG00000166833 | NAV2        | 38          | 37          | 6.14E-01              |
| ENSG00000170525 | PFKFB3      | 38          | 37          | 7.40E-01              |
| ENSG00000170871 | KIAA0232    | 38          | 37          | 6.88E-01              |
| ENSG00000215030 | RPL13P12    | 38          | 37          | 6.30E-01              |
| ENSG00000226711 | FAM66C      | 38          | 37          | 6.18E-01              |
| ENSG00000227240 | AL136456.1  | 38          | 37          | 1.62E-01              |
| ENSG00000244050 | DEFB109F*   | 74          | 1           | 7.68E-01              |
| ENSG00000248869 | LINC02511*  | 62          | 13          | 8.81E-01              |
| ENSG00000251165 | F11-AS1*    | 48          | 27          | 3.43E-02              |
| ENSG00000253343 | AC114550.2* | 66          | 9           | 3.95E-01              |
| ENSG00000254894 | NAV2-AS1*   | 68          | 7           | 4.76E-01              |
| ENSG00000277315 | AL021879.1* | 74          | 1           | 8.68E-01              |
| ENSG00000288245 | AL355836.4* | 75          | 0           | NA                    |

\*We grouped those expressing or not expressing the gene because most of the cases did not express this gene.

**Table S7.1. Results of HLA-A subtypes significantly associated with HCC in the Taiwanese population.** Abbreviations: OR, odds ratio; CI, confidence interval; N, allele number; NA, not available.

| <i>Genotype</i> | <i>Control</i><br><i>N=241,306</i> | <i>Case</i><br><i>N=5,858</i> | <i>P-value<sup>a</sup></i> | <i>Q-value<sup>b</sup></i> | <i>OR</i> | <i>95% CI</i> | <i>Allele Frequency</i> |
|-----------------|------------------------------------|-------------------------------|----------------------------|----------------------------|-----------|---------------|-------------------------|
| *01:01          | 1071 (0.44%)                       | 23 (0.39%)                    | 6.20E-01                   | 1.42E+00                   | 1.15      | 0.76-1.83     | 0.58%                   |
| *02:01          | 8574 (3.55%)                       | 217 (3.7%)                    | 6.94E-01                   | 1.01E+00                   | 0.97      | 0.85-1.12     | 9.94%                   |
| *02:03          | 5734 (2.38%)                       | 158 (2.7%)                    | 1.66E-01                   | 2.66E+00                   | 0.89      | 0.76-1.06     | 6.21%                   |
| *02:05          | 66 (0.03%)                         | 2 (0.03%)                     | 6.80E-01                   | 1.21E+00                   | 0.81      | 0.22-6.87     | 0.05%                   |
| *02:06          | 362 (0.15%)                        | 9 (0.15%)                     | 8.66E-01                   | 1.15E+00                   | 0.99      | 0.52-2.19     | 2.70%                   |
| *02:07          | 18942 (7.85%)                      | 459 (7.84%)                   | 6.91E-01                   | 1.11E+00                   | 1.02      | 0.93-1.13     | 10.72%                  |
| *03:01          | 682 (0.28%)                        | 13 (0.22%)                    | 4.55E-01                   | 1.82E+00                   | 1.3       | 0.75-2.45     | 0.39%                   |
| *11:01          | 54869 (22.74%)                     | 1333 (22.76%)                 | 4.80E-01                   | 1.54E+00                   | 1.02      | 0.96-1.1      | 28.82%                  |
| *11:02          | 8801 (3.65%)                       | 203 (3.47%)                   | 3.40E-01                   | 1.82E+00                   | 1.07      | 0.93-1.25     | 4.98%                   |
| *24:02          | 32348 (13.41%)                     | 815 (13.91%)                  | 5.23E-01                   | 1.39E+00                   | 0.98      | 0.9-1.06      | 17.31%                  |
| *26:01          | 4820 (2%)                          | 119 (2.03%)                   | 1.00E+00                   | 1.14E+00                   | 1         | 0.83-1.21     | 2.79%                   |
| *30:01          | 2690 (1.11%)                       | 66 (1.13%)                    | 1.00E+00                   | 1.14E+00                   | 1.01      | 0.79-1.31     | 1.30%                   |
| *31:01          | 3599 (1.49%)                       | 89 (1.52%)                    | 9.57E-01                   | 1.18E+00                   | 1         | 0.81-1.25     | 2.00%                   |
| *32:01          | 642 (0.27%)                        | 21 (0.36%)                    | 2.03E-01                   | 1.62E+00                   | 0.75      | 0.49-1.23     | 0.37%                   |
| *33:03          | 22584 (9.36%)                      | 567 (9.68%)                   | 6.78E-01                   | 1.36E+00                   | 0.98      | 0.9-1.07      | 11.06%                  |
| *68:01          | 30 (0.01%)                         | 0 (0%)                        | NA                         | NA                         | NA        | NA            | 0.15%                   |

<sup>a</sup>P value for Fisher's exact test.

<sup>b</sup>Q value for FDR-BH adjustment.

**Table S7.2. Results of HLA-A subtypes significantly associated with HBV infection in the Taiwanese population.** Abbreviations: OR, odds ratio; CI, confidence interval; N, allele number; NA, not available.

| <i>Genotype</i> | <i>HBsAg-</i><br><i>N=114,898</i> | <i>HBsAg+</i><br><i>N=22,632</i> | <i>P-value<sup>a</sup></i> | <i>Q-value<sup>b</sup></i> | <i>OR</i> | <i>95% CI</i> | <i>Allele Frequency</i> |
|-----------------|-----------------------------------|----------------------------------|----------------------------|----------------------------|-----------|---------------|-------------------------|
| *01:01          | 488 (0.42%)                       | 77 (0.34%)                       | 4.78E-02                   | 1.28E-01                   | 1.28      | 1-1.65        | 0.58%                   |
| *02:01          | 4130 (3.59%)                      | 859 (3.8%)                       | 3.60E-01                   | 4.43E-01                   | 0.97      | 0.9-1.04      | 9.94%                   |
| *02:03          | 2840 (2.47%)                      | 603 (2.66%)                      | 2.27E-01                   | 3.63E-01                   | 0.95      | 0.86-1.04     | 6.21%                   |
| *02:05          | 36 (0.03%)                        | 4 (0.02%)                        | 3.94E-01                   | 4.50E-01                   | 1.81      | 0.65-7.01     | 0.05%                   |
| *02:06          | 181 (0.16%)                       | 48 (0.21%)                       | 9.22E-02                   | 1.84E-01                   | 0.76      | 0.55-1.07     | 2.70%                   |
| *02:07          | 9037 (7.87%)                      | 1863 (8.23%)                     | 3.13E-01                   | 4.17E-01                   | 0.97      | 0.92-1.03     | 10.72%                  |
| *03:01          | 322 (0.28%)                       | 57 (0.25%)                       | 4.08E-01                   | 4.08E-01                   | 1.14      | 0.86-1.54     | 0.39%                   |
| *11:01          | 25957 (22.59%)                    | 5055 (22.34%)                    | 9.69E-03                   | 3.10E-02                   | 1.05      | 1.01-1.09     | 28.82%                  |
| *11:02          | 4213 (3.67%)                      | 821 (3.63%)                      | 4.04E-01                   | 4.31E-01                   | 1.03      | 0.96-1.12     | 4.98%                   |
| *24:02          | 15116 (13.16%)                    | 3334 (14.73%)                    | 1.12E-07                   | 1.78E-06                   | 0.89      | 0.85-0.93     | 17.31%                  |
| *26:01          | 2244 (1.95%)                      | 495 (2.19%)                      | 6.16E-02                   | 1.41E-01                   | 0.91      | 0.82-1.01     | 2.79%                   |
| *30:01          | 1319 (1.15%)                      | 178 (0.79%)                      | 1.56E-07                   | 1.25E-06                   | 1.5       | 1.28-1.76     | 1.30%                   |
| *31:01          | 1724 (1.5%)                       | 378 (1.67%)                      | 1.32E-01                   | 2.35E-01                   | 0.92      | 0.82-1.03     | 2.00%                   |
| *32:01          | 325 (0.28%)                       | 41 (0.18%)                       | 3.92E-03                   | 1.57E-02                   | 1.6       | 1.15-2.27     | 0.37%                   |
| *33:03          | 10922 (9.51%)                     | 2055 (9.08%)                     | 2.60E-03                   | 1.39E-02                   | 1.08      | 1.03-1.14     | 11.06%                  |

|        |            |        |    |    |    |    |       |
|--------|------------|--------|----|----|----|----|-------|
| *68:01 | 12 (0.01%) | 0 (0%) | NA | NA | NA | NA | 0.15% |
|--------|------------|--------|----|----|----|----|-------|

<sup>a</sup>P value for Fisher's exact test.  
<sup>b</sup>Q value for FDR-BH adjustment.

**Table S7.3. Results of HLA-A subtypes significantly associated with HCV infection in the Taiwanese population.** Abbreviations: OR, odds ratio; CI, confidence interval; N, allele number.

| <i>Genotype</i> | <i>HCVab-<br/>N=113,974</i> | <i>HCVab+<br/>N=10,048</i> | <i>P-value<sup>a</sup></i> | <i>Q-value<sup>b</sup></i> | <i>OR</i> | <i>95% CI</i> | <i>Allele<br/>Frequency</i> |
|-----------------|-----------------------------|----------------------------|----------------------------|----------------------------|-----------|---------------|-----------------------------|
| *01:01          | 488 (0.43%)                 | 34 (0.34%)                 | 1.74E-01                   | 5.56E-01                   | 1.28      | 0.91-1.88     | 0.58%                       |
| *02:01          | 4135 (3.63%)                | 372 (3.7%)                 | 8.89E-01                   | 9.48E-01                   | 0.99      | 0.89-1.11     | 9.94%                       |
| *02:03          | 2795 (2.45%)                | 254 (2.53%)                | 7.88E-01                   | 1.05E+00                   | 0.98      | 0.86-1.12     | 6.21%                       |
| *02:05          | 34 (0.03%)                  | 2 (0.02%)                  | 7.66E-01                   | 1.11E+00                   | 1.52      | 0.39-13.05    | 0.05%                       |
| *02:06          | 189 (0.17%)                 | 15 (0.15%)                 | 7.98E-01                   | 9.82E-01                   | 1.13      | 0.66-2.05     | 2.70%                       |
| *02:07          | 9100 (7.98%)                | 759 (7.55%)                | 5.58E-02                   | 4.47E-01                   | 1.08      | 1-1.17        | 10.72%                      |
| *03:01          | 309 (0.27%)                 | 19 (0.19%)                 | 1.29E-01                   | 5.18E-01                   | 1.45      | 0.91-2.45     | 0.39%                       |
| *11:01          | 25694 (22.54%)              | 2325 (23.14%)              | 4.65E-01                   | 1.24E+00                   | 0.98      | 0.93-1.03     | 28.82%                      |
| *11:02          | 4270 (3.75%)                | 346 (3.44%)                | 7.31E-02                   | 3.90E-01                   | 1.11      | 0.99-1.24     | 4.98%                       |
| *24:02          | 15295 (13.42%)              | 1369 (13.62%)              | 9.37E-01                   | 9.37E-01                   | 1         | 0.94-1.06     | 17.31%                      |
| *26:01          | 2271 (1.99%)                | 199 (1.98%)                | 8.23E-01                   | 9.41E-01                   | 1.02      | 0.88-1.19     | 2.79%                       |
| *30:01          | 1247 (1.09%)                | 115 (1.14%)                | 7.27E-01                   | 1.16E+00                   | 0.97      | 0.8-1.18      | 1.30%                       |
| *31:01          | 1754 (1.54%)                | 150 (1.49%)                | 6.42E-01                   | 1.14E+00                   | 1.05      | 0.88-1.25     | 2.00%                       |
| *32:01          | 298 (0.26%)                 | 23 (0.23%)                 | 6.10E-01                   | 1.22E+00                   | 1.16      | 0.76-1.86     | 0.37%                       |
| *33:03          | 10686 (9.38%)               | 1035 (10.3%)               | 7.73E-03                   | 1.24E-01                   | 0.91      | 0.85-0.98     | 11.06%                      |
| *68:01          | 9 (0.01%)                   | 1 (0.01%)                  | 5.75E-01                   | 1.31E+00                   | 0.8       | 0.11-35.24    | 0.15%                       |

<sup>a</sup>P value for Fisher's exact test.  
<sup>b</sup>Q-value for FDR-BH adjustment.

**Table S7.4. Results of HLA-B subtypes significantly associated with HCC in the Taiwanese population.** Abbreviations: OR, odds ratio; CI, confidence interval; N, allele number; NA, not available.

| <i>Genotype</i> | <i>Control<br/>N=241,306</i> | <i>Case<br/>N=5,858</i> | <i>P-value<sup>a</sup></i> | <i>Q-value<sup>b</sup></i> | <i>OR</i> | <i>95% CI</i> | <i>Allele<br/>Frequency</i> |
|-----------------|------------------------------|-------------------------|----------------------------|----------------------------|-----------|---------------|-----------------------------|
| *07:02          | 437 (0.18%)                  | 13 (0.22%)              | 4.39E-01                   | 9.05E-01                   | 0.82      | 0.47-1.56     | 0.35%                       |
| *13:01          | 11011 (4.56%)                | 282 (4.81%)             | 4.22E-01                   | 9.29E-01                   | 0.95      | 0.84-1.08     | 6.39%                       |
| *13:02          | 2686 (1.11%)                 | 66 (1.13%)              | 9.50E-01                   | 1.12E+00                   | 0.99      | 0.78-1.29     | 1.44%                       |
| *15:01          | 645 (0.27%)                  | 10 (0.17%)              | 1.97E-01                   | 8.12E-01                   | 1.58      | 0.85-3.31     | 4.12%                       |
| *15:02          | 7135 (2.96%)                 | 178 (3.04%)             | 7.83E-01                   | 1.08E+00                   | 0.98      | 0.84-1.15     | 4.22%                       |
| *15:11          | 615 (0.25%)                  | 16 (0.27%)              | 7.93E-01                   | 1.05E+00                   | 0.94      | 0.57-1.66     | 0.67%                       |
| *15:18          | 621 (0.26%)                  | 17 (0.29%)              | 6.02E-01                   | 9.46E-01                   | 0.89      | 0.55-1.54     | 0.63%                       |
| *15:25          | 1230 (0.51%)                 | 24 (0.41%)              | 3.07E-01                   | 9.20E-01                   | 1.26      | 0.84-1.97     | 0.76%                       |
| *27:04          | 5389 (2.23%)                 | 119 (2.03%)             | 2.80E-01                   | 9.24E-01                   | 1.11      | 0.92-1.35     | 3.13%                       |

|        |                |              |          |          |      |             |        |
|--------|----------------|--------------|----------|----------|------|-------------|--------|
| *35:01 | 2801 (1.16%)   | 67 (1.14%)   | 9.51E-01 | 1.08E+00 | 1.02 | 0.8-1.33    | 2.78%  |
| *35:03 | 152 (0.06%)    | 7 (0.12%)    | 1.09E-01 | 7.21E-01 | 0.53 | 0.25-1.34   | 0.12%  |
| *37:01 | 637 (0.26%)    | 23 (0.39%)   | 7.21E-02 | 5.95E-01 | 0.68 | 0.45-1.08   | 0.37%  |
| *38:02 | 6922 (2.87%)   | 206 (3.52%)  | 5.32E-03 | 8.79E-02 | 0.81 | 0.7-0.94    | 4.25%  |
| *39:01 | 7 (0%)         | 0 (0%)       | NA       | NA       | NA   | NA          | 2.73%  |
| *40:01 | 37737 (15.64%) | 904 (15.43%) | 4.97E-01 | 9.65E-01 | 1.03 | 0.95-1.11   | 20.96% |
| *40:02 | 2550 (1.06%)   | 55 (0.94%)   | 3.99E-01 | 1.01E+00 | 1.14 | 0.87-1.52   | 2.19%  |
| *40:06 | 2231 (0.92%)   | 46 (0.79%)   | 2.68E-01 | 9.84E-01 | 1.19 | 0.89-1.63   | 1.27%  |
| *44:02 | 222 (0.09%)    | 3 (0.05%)    | 3.85E-01 | 1.06E+00 | 1.81 | 0.61-8.85   | 0.21%  |
| *44:03 | 479 (0.2%)     | 11 (0.19%)   | 1.00E+00 | 1.10E+00 | 1.06 | 0.59-2.15   | 0.39%  |
| *46:01 | 23522 (9.75%)  | 580 (9.9%)   | 8.18E-01 | 1.04E+00 | 0.99 | 0.9-1.09    | 13.52% |
| *48:01 | 1057 (0.44%)   | 22 (0.38%)   | 5.47E-01 | 9.50E-01 | 1.18 | 0.77-1.89   | 1.48%  |
| *50:01 | 103 (0.04%)    | 1 (0.02%)    | 5.24E-01 | 9.61E-01 | 2.52 | 0.44-100.46 | 0.09%  |
| *51:01 | 5331 (2.21%)   | 108 (1.84%)  | 5.14E-02 | 5.65E-01 | 1.21 | 1-1.49      | 4.35%  |
| *51:02 | 1343 (0.56%)   | 35 (0.6%)    | 6.58E-01 | 9.87E-01 | 0.94 | 0.67-1.35   | 1.24%  |
| *52:01 | 1512 (0.63%)   | 42 (0.72%)   | 4.03E-01 | 9.49E-01 | 0.88 | 0.65-1.23   | 0.97%  |
| *54:01 | 4815 (2%)      | 161 (2.75%)  | 1.27E-04 | 4.19E-03 | 0.72 | 0.61-0.85   | 3.91%  |
| *55:02 | 1415 (0.59%)   | 33 (0.56%)   | 8.63E-01 | 1.05E+00 | 1.05 | 0.74-1.53   | 3.47%  |
| *56:01 | 322 (0.13%)    | 12 (0.2%)    | 1.48E-01 | 6.99E-01 | 0.66 | 0.37-1.28   | 0.47%  |
| *56:03 | 301 (0.12%)    | 5 (0.09%)    | 5.70E-01 | 9.41E-01 | 1.47 | 0.62-4.57   | 0.35%  |
| *56:04 | 11 (0%)        | 0 (0%)       | NA       | NA       | NA   | NA          | 0.12%  |
| *57:01 | 285 (0.12%)    | 5 (0.09%)    | 6.97E-01 | 1.00E+00 | 1.39 | 0.59-4.33   | 0.17%  |
| *58:01 | 20121 (8.34%)  | 461 (7.87%)  | 1.40E-01 | 7.68E-01 | 1.08 | 0.98-1.19   | 10.77% |
| *67:01 | 1 (0%)         | 0 (0%)       | NA       | NA       | NA   | NA          | 0.24%  |

<sup>a</sup>*P* value for Fisher's exact test.

<sup>b</sup>*Q*-value for FDR-BH adjustment.

**Table S7.5. Results of HLA-B subtypes significantly associated with HBV infection in the Taiwanese population.** Abbreviations: OR, odds ratio; CI, confidence interval; N, allele number; NA, not available.

| <i>Genotype</i> | <i>HBSag-</i><br><i>N=114,898</i> | <i>HBSag+</i><br><i>N=22,632</i> | <i>P-value</i> <sup>a</sup> | <i>Q-value</i> <sup>b</sup> | <i>OR</i> | <i>95% CI</i> | <i>Allele Frequency</i> |
|-----------------|-----------------------------------|----------------------------------|-----------------------------|-----------------------------|-----------|---------------|-------------------------|
| *07:02          | 208 (0.18%)                       | 22 (0.1%)                        | 2.53E-03                    | 8.35E-03                    | 1.9       | 1.22-3.1      | 0.35%                   |
| *13:01          | 5217 (4.54%)                      | 1096 (4.84%)                     | 1.66E-01                    | 2.73E-01                    | 0.95      | 0.89-1.02     | 6.39%                   |
| *13:02          | 1301 (1.13%)                      | 165 (0.73%)                      | 3.36E-09                    | 5.54E-08                    | 1.6       | 1.35-1.89     | 1.44%                   |
| *15:01          | 336 (0.29%)                       | 69 (0.3%)                        | 8.42E-01                    | 9.26E-01                    | 0.98      | 0.75-1.29     | 4.12%                   |
| *15:02          | 3306 (2.88%)                      | 745 (3.29%)                      | 4.08E-03                    | 1.23E-02                    | 0.89      | 0.82-0.96     | 4.22%                   |
| *15:11          | 311 (0.27%)                       | 51 (0.23%)                       | 2.04E-01                    | 3.05E-01                    | 1.23      | 0.91-1.68     | 0.67%                   |
| *15:18          | 327 (0.28%)                       | 53 (0.23%)                       | 1.68E-01                    | 2.64E-01                    | 1.24      | 0.93-1.69     | 0.63%                   |
| *15:25          | 575 (0.5%)                        | 105 (0.46%)                      | 3.81E-01                    | 5.47E-01                    | 1.1       | 0.89-1.37     | 0.76%                   |
| *27:04          | 2608 (2.27%)                      | 562 (2.48%)                      | 1.26E-01                    | 2.19E-01                    | 0.93      | 0.85-1.02     | 3.13%                   |
| *35:01          | 1356 (1.18%)                      | 236 (1.04%)                      | 4.18E-02                    | 1.06E-01                    | 1.16      | 1.01-1.34     | 2.78%                   |
| *35:03          | 79 (0.07%)                        | 8 (0.04%)                        | 6.15E-02                    | 1.35E-01                    | 1.98      | 0.96-4.76     | 0.12%                   |

|        |                |               |          |          |      |            |        |
|--------|----------------|---------------|----------|----------|------|------------|--------|
| *37:01 | 311 (0.27%)    | 46 (0.2%)     | 5.47E-02 | 1.29E-01 | 1.36 | 0.99-1.9   | 0.37%  |
| *38:02 | 3376 (2.94%)   | 811 (3.58%)   | 3.95E-06 | 3.26E-05 | 0.83 | 0.76-0.9   | 4.25%  |
| *39:01 | 6 (0.01%)      | 2 (0.01%)     | 6.28E-01 | 7.98E-01 | 0.6  | 0.11-6.11  | 2.73%  |
| *40:01 | 17757 (15.45%) | 3851 (17.02%) | 6.09E-07 | 6.70E-06 | 0.9  | 0.86-0.94  | 20.96% |
| *40:02 | 1157 (1.01%)   | 232 (1.03%)   | 1.00E+00 | 1.06E+00 | 1    | 0.87-1.16  | 2.19%  |
| *40:06 | 1059 (0.92%)   | 178 (0.79%)   | 2.60E-02 | 7.14E-02 | 1.2  | 1.02-1.41  | 1.27%  |
| *44:02 | 124 (0.11%)    | 10 (0.04%)    | 2.44E-03 | 8.96E-03 | 2.49 | 1.31-5.33  | 0.21%  |
| *44:03 | 220 (0.19%)    | 19 (0.08%)    | 1.18E-04 | 6.49E-04 | 2.33 | 1.46-3.95  | 0.39%  |
| *46:01 | 11219 (9.76%)  | 2430 (10.74%) | 2.58E-04 | 1.22E-03 | 0.91 | 0.87-0.96  | 13.52% |
| *48:01 | 480 (0.42%)    | 77 (0.34%)    | 6.82E-02 | 1.41E-01 | 1.25 | 0.98-1.62  | 1.48%  |
| *50:01 | 53 (0.05%)     | 9 (0.04%)     | 7.36E-01 | 8.37E-01 | 1.18 | 0.58-2.73  | 0.09%  |
| *51:01 | 2549 (2.22%)   | 432 (1.91%)   | 7.38E-04 | 3.04E-03 | 1.19 | 1.07-1.33  | 4.35%  |
| *51:02 | 633 (0.55%)    | 149 (0.66%)   | 8.31E-02 | 1.61E-01 | 0.85 | 0.71-1.03  | 1.24%  |
| *52:01 | 801 (0.7%)     | 108 (0.48%)   | 4.64E-05 | 3.07E-04 | 1.5  | 1.22-1.85  | 0.97%  |
| *54:01 | 2368 (2.06%)   | 513 (2.27%)   | 1.15E-01 | 2.11E-01 | 0.92 | 0.84-1.02  | 3.91%  |
| *55:02 | 660 (0.57%)    | 126 (0.56%)   | 6.31E-01 | 7.71E-01 | 1.05 | 0.87-1.29  | 3.47%  |
| *56:01 | 165 (0.14%)    | 28 (0.12%)    | 4.41E-01 | 6.07E-01 | 1.18 | 0.79-1.84  | 0.47%  |
| *56:03 | 126 (0.11%)    | 28 (0.12%)    | 5.90E-01 | 7.79E-01 | 0.9  | 0.6-1.42   | 0.35%  |
| *56:04 | 7 (0.01%)      | 1 (0%)        | 1.00E+00 | 1.06E+00 | 1.41 | 0.18-63.37 | 0.12%  |
| *57:01 | 125 (0.11%)    | 22 (0.1%)     | 6.58E-01 | 7.76E-01 | 1.14 | 0.72-1.89  | 0.17%  |
| *58:01 | 9712 (8.45%)   | 1584 (7%)     | 2.99E-17 | 9.85E-16 | 1.27 | 1.2-1.34   | 10.77% |
| *67:01 | 0 (0%)         | 0 (0%)        | NA       | NA       | NA   | NA         | 0.24%  |

<sup>a</sup>P value for Fisher's exact test.

<sup>b</sup>Q value for FDR-BH adjustment.

**Table S7.6. Results of HLA-B subtypes significantly associated with HCV infection in the Taiwanese population.** Abbreviations: OR, odds ratio; CI, confidence interval; N, allele number; NA, not available.

| <i>Genotype</i> | <i>HCVab-</i><br><i>N=113,974</i> | <i>HCVab+</i><br><i>N=10,048</i> | <i>P-value<sup>a</sup></i> | <i>Q-value<sup>b</sup></i> | <i>OR</i> | <i>95% CI</i> | <i>Allele Frequency</i> |
|-----------------|-----------------------------------|----------------------------------|----------------------------|----------------------------|-----------|---------------|-------------------------|
| *07:02          | 179 (0.16%)                       | 24 (0.24%)                       | 7.15E-02                   | 3.93E-01                   | 0.67      | 0.43-1.07     | 0.35%                   |
| *13:01          | 5204 (4.57%)                      | 477 (4.75%)                      | 5.97E-01                   | 9.86E-01                   | 0.97      | 0.88-1.08     | 6.39%                   |
| *13:02          | 1198 (1.05%)                      | 122 (1.21%)                      | 1.72E-01                   | 6.30E-01                   | 0.88      | 0.73-1.07     | 1.44%                   |
| *15:01          | 339 (0.3%)                        | 34 (0.34%)                       | 5.08E-01                   | 9.86E-01                   | 0.89      | 0.62-1.31     | 4.12%                   |
| *15:02          | 3377 (2.96%)                      | 269 (2.68%)                      | 6.34E-02                   | 4.18E-01                   | 1.13      | 0.99-1.29     | 4.22%                   |
| *15:11          | 298 (0.26%)                       | 22 (0.22%)                       | 4.74E-01                   | 9.78E-01                   | 1.21      | 0.79-1.97     | 0.67%                   |
| *15:18          | 331 (0.29%)                       | 18 (0.18%)                       | 3.94E-02                   | 4.33E-01                   | 1.65      | 1.03-2.82     | 0.63%                   |
| *15:25          | 575 (0.5%)                        | 53 (0.53%)                       | 8.27E-01                   | 1.14E+00                   | 0.97      | 0.73-1.31     | 0.76%                   |
| *27:04          | 2704 (2.37%)                      | 218 (2.17%)                      | 1.39E-01                   | 5.74E-01                   | 1.11      | 0.97-1.29     | 3.13%                   |
| *35:01          | 1369 (1.2%)                       | 95 (0.95%)                       | 1.41E-02                   | 2.33E-01                   | 1.29      | 1.05-1.61     | 2.78%                   |
| *35:03          | 72 (0.06%)                        | 5 (0.05%)                        | 8.34E-01                   | 1.10E+00                   | 1.29      | 0.53-4.09     | 0.12%                   |
| *37:01          | 302 (0.26%)                       | 23 (0.23%)                       | 5.43E-01                   | 9.43E-01                   | 1.18      | 0.77-1.88     | 0.37%                   |
| *38:02          | 3420 (3%)                         | 326 (3.24%)                      | 2.59E-01                   | 7.76E-01                   | 0.94      | 0.83-1.05     | 4.25%                   |



|        |                |               |          |          |      |           |        |
|--------|----------------|---------------|----------|----------|------|-----------|--------|
| *39:01 | 6 (0.01%)      | 0 (0%)        | NA       | NA       | NA   | NA        | 2.73%  |
| *40:01 | 17939 (15.74%) | 1586 (15.78%) | 6.16E-01 | 9.69E-01 | 1.02 | 0.96-1.08 | 20.96% |
| *40:02 | 1144 (1%)      | 104 (1.04%)   | 8.76E-01 | 1.11E+00 | 0.98 | 0.8-1.22  | 2.19%  |
| *40:06 | 1048 (0.92%)   | 80 (0.8%)     | 1.89E-01 | 6.25E-01 | 1.17 | 0.93-1.5  | 1.27%  |
| *44:02 | 110 (0.1%)     | 11 (0.11%)    | 7.39E-01 | 1.11E+00 | 0.89 | 0.48-1.84 | 0.21%  |
| *44:03 | 190 (0.17%)    | 20 (0.2%)     | 4.51E-01 | 9.92E-01 | 0.85 | 0.53-1.42 | 0.39%  |
| *46:01 | 11351 (9.96%)  | 957 (9.52%)   | 5.45E-02 | 4.49E-01 | 1.07 | 1-1.15    | 13.52% |
| *48:01 | 461 (0.4%)     | 40 (0.4%)     | 9.35E-01 | 1.10E+00 | 1.03 | 0.74-1.46 | 1.48%  |
| *50:01 | 51 (0.04%)     | 4 (0.04%)     | 1.00E+00 | 1.14E+00 | 1.14 | 0.42-4.35 | 0.09%  |
| *51:01 | 2443 (2.14%)   | 223 (2.22%)   | 7.74E-01 | 1.11E+00 | 0.98 | 0.85-1.13 | 4.35%  |
| *51:02 | 645 (0.57%)    | 64 (0.64%)    | 4.10E-01 | 1.04E+00 | 0.9  | 0.69-1.18 | 1.24%  |
| *52:01 | 746 (0.65%)    | 80 (0.8%)     | 1.26E-01 | 5.93E-01 | 0.83 | 0.66-1.06 | 0.97%  |
| *54:01 | 2351 (2.06%)   | 223 (2.22%)   | 4.01E-01 | 1.10E+00 | 0.94 | 0.82-1.09 | 3.91%  |
| *55:02 | 653 (0.57%)    | 63 (0.63%)    | 5.38E-01 | 9.87E-01 | 0.93 | 0.71-1.22 | 3.47%  |
| *56:01 | 162 (0.14%)    | 15 (0.15%)    | 8.91E-01 | 1.09E+00 | 0.97 | 0.57-1.77 | 0.47%  |
| *56:03 | 126 (0.11%)    | 14 (0.14%)    | 4.39E-01 | 1.03E+00 | 0.8  | 0.46-1.52 | 0.35%  |
| *56:04 | 8 (0.01%)      | 0 (0%)        | NA       | NA       | NA   | NA        | 0.12%  |
| *57:01 | 117 (0.1%)     | 10 (0.1%)     | 1.00E+00 | 1.14E+00 | 1.05 | 0.55-2.24 | 0.17%  |
| *58:01 | 9277 (8.14%)   | 920 (9.16%)   | 1.45E-03 | 4.78E-02 | 0.89 | 0.82-0.96 | 10.77% |
| *67:01 | 0 (0%)         | 0 (0%)        | NA       | NA       | NA   | NA        | 0.24%  |

<sup>a</sup>P value for Fisher's exact test.

<sup>b</sup>Q value for FDR-BH adjustment.

**Table S7.7. Results of HLA-C subtypes significantly associated with HCC in the Taiwanese population.**  
Abbreviations: OR, odds ratio; CI, confidence interval; N, allele number; NA, not available.

| <i>Genotype</i> | <i>Control</i>   | <i>Case</i>    | <i>P-value<sup>a</sup></i> | <i>Q-value<sup>b</sup></i> | <i>OR</i> | <i>95% CI</i> | <i>Allele Frequency</i> |
|-----------------|------------------|----------------|----------------------------|----------------------------|-----------|---------------|-------------------------|
|                 | <i>N=241,306</i> | <i>N=5,858</i> |                            |                            |           |               |                         |
| *01:02          | 38654 (16.02%)   | 1017 (17.36%)  | 2.90E-02                   | 5.50E-01                   | 0.92      | 0.86-0.99     | 20.08%                  |
| *02:02          | 3 (0%)           | 0 (0%)         | NA                         | NA                         | NA        | NA            | 0.11%                   |
| *03:02          | 23448 (9.72%)    | 552 (9.42%)    | 2.34E-01                   | 6.34E-01                   | 1.06      | 0.97-1.16     | 10.80%                  |
| *03:03          | 8447 (3.5%)      | 179 (3.06%)    | 3.72E-02                   | 2.36E-01                   | 1.17      | 1.01-1.37     | 4.91%                   |
| *03:04          | 24239 (10.04%)   | 607 (10.36%)   | 7.40E-01                   | 8.78E-01                   | 0.99      | 0.9-1.08      | 12.70%                  |
| *04:01          | 6799 (2.82%)     | 175 (2.99%)    | 5.78E-01                   | 1.10E+00                   | 0.96      | 0.82-1.12     | 3.80%                   |
| *04:03          | 3348 (1.39%)     | 77 (1.31%)     | 5.74E-01                   | 1.21E+00                   | 1.08      | 0.86-1.37     | 1.73%                   |
| *04:82          | 906 (0.38%)      | 24 (0.41%)     | 6.69E-01                   | 1.06E+00                   | 0.93      | 0.62-1.47     | 0.64%                   |
| *06:02          | 4405 (1.83%)     | 110 (1.88%)    | 8.83E-01                   | 9.87E-01                   | 0.99      | 0.82-1.21     | 2.06%                   |
| *07:02          | 39824 (16.5%)    | 1021 (17.43%)  | 1.97E-01                   | 6.25E-01                   | 0.95      | 0.89-1.03     | 21.20%                  |
| *07:04          | 813 (0.34%)      | 18 (0.31%)     | 7.34E-01                   | 9.30E-01                   | 1.12      | 0.7-1.9       | 0.66%                   |
| *07:06          | 364 (0.15%)      | 10 (0.17%)     | 7.34E-01                   | 9.96E-01                   | 0.9       | 0.48-1.89     | 0.19%                   |
| *08:01          | 12202 (5.06%)    | 295 (5.04%)    | 7.18E-01                   | 1.05E+00                   | 1.02      | 0.91-1.16     | 7.55%                   |
| *12:02          | 8716 (3.61%)     | 193 (3.29%)    | 1.28E-01                   | 4.88E-01                   | 1.12      | 0.97-1.3      | 4.15%                   |
| *12:03          | 1462 (0.61%)     | 35 (0.6%)      | 9.33E-01                   | 9.84E-01                   | 1.03      | 0.74-1.49     | 0.92%                   |

|        |             |             |          |          |      |            |       |
|--------|-------------|-------------|----------|----------|------|------------|-------|
| *14:02 | 7233 (3%)   | 151 (2.58%) | 3.67E-02 | 3.48E-01 | 1.19 | 1.01-1.41  | 3.51% |
| *14:03 | 193 (0.08%) | 1 (0.02%)   | 9.77E-02 | 4.64E-01 | 4.77 | 0.85-189.5 | 0.09% |
| *15:02 | 7470 (3.1%) | 197 (3.36%) | 3.62E-01 | 8.60E-01 | 0.93 | 0.81-1.09  | 4.06% |
| *16:02 | 50 (0.02%)  | 0 (0%)      | NA       | NA       | NA   | NA         | 0.13% |

<sup>a</sup>P value for Fisher's exact test.

<sup>b</sup>Q value for FDR-BH adjustment.

**Table S7.8. Results of HLA-C subtypes significantly associated with HBV infection in the Taiwanese population.** Abbreviations: OR, odds ratio; CI, confidence interval; N, allele number; NA, not available.

| <i>Genotype</i> | <i>HBSag-</i><br><i>N=114,898</i> | <i>HBSag+</i><br><i>N=22,632</i> | <i>P-value<sup>a</sup></i> | <i>Q-value<sup>b</sup></i> | <i>OR</i> | <i>95% CI</i> | <i>Allele Frequency</i> |
|-----------------|-----------------------------------|----------------------------------|----------------------------|----------------------------|-----------|---------------|-------------------------|
| *01:02          | 18549 (16.14%)                    | 3923 (17.33%)                    | 4.40E-05                   | 1.19E-04                   | 0.92      | 0.89-0.96     | 20.08%                  |
| *02:02          | 1 (0%)                            | 0 (0%)                           | NA                         | NA                         | NA        | NA            | 0.11%                   |
| *03:02          | 11302 (9.84%)                     | 1853 (8.19%)                     | 1.52E-16                   | 2.89E-15                   | 1.24      | 1.18-1.31     | 10.80%                  |
| *03:03          | 3957 (3.44%)                      | 777 (3.43%)                      | 8.10E-01                   | 1.03E+00                   | 1.01      | 0.93-1.09     | 4.91%                   |
| *03:04          | 11453 (9.97%)                     | 2440 (10.78%)                    | 6.45E-04                   | 1.36E-03                   | 0.92      | 0.88-0.97     | 12.70%                  |
| *04:01          | 3269 (2.85%)                      | 549 (2.43%)                      | 1.95E-04                   | 4.63E-04                   | 1.19      | 1.08-1.3      | 3.80%                   |
| *04:03          | 1605 (1.4%)                       | 320 (1.41%)                      | 9.26E-01                   | 1.03E+00                   | 0.99      | 0.88-1.13     | 1.73%                   |
| *04:82          | 487 (0.42%)                       | 79 (0.35%)                       | 1.00E-01                   | 1.90E-01                   | 1.22      | 0.96-1.57     | 0.64%                   |
| *06:02          | 2126 (1.85%)                      | 292 (1.29%)                      | 5.32E-10                   | 5.05E-09                   | 1.45      | 1.29-1.65     | 2.06%                   |
| *07:02          | 18795 (16.36%)                    | 4011 (17.72%)                    | 2.53E-06                   | 1.60E-05                   | 0.91      | 0.88-0.95     | 21.20%                  |
| *07:04          | 414 (0.36%)                       | 77 (0.34%)                       | 6.70E-01                   | 9.09E-01                   | 1.07      | 0.83-1.38     | 0.66%                   |
| *07:06          | 162 (0.14%)                       | 23 (0.1%)                        | 1.38E-01                   | 2.39E-01                   | 1.4       | 0.9-2.27      | 0.19%                   |
| *08:01          | 5764 (5.02%)                      | 1140 (5.04%)                     | 9.47E-01                   | 9.99E-01                   | 1         | 0.94-1.07     | 7.55%                   |
| *12:02          | 4289 (3.73%)                      | 834 (3.69%)                      | 6.03E-01                   | 8.81E-01                   | 1.02      | 0.95-1.1      | 4.15%                   |
| *12:03          | 701 (0.61%)                       | 136 (0.6%)                       | 8.52E-01                   | 1.01E+00                   | 1.02      | 0.85-1.24     | 0.92%                   |
| *14:02          | 3496 (3.04%)                      | 569 (2.51%)                      | 5.59E-06                   | 2.66E-05                   | 1.23      | 1.12-1.35     | 3.51%                   |
| *14:03          | 89 (0.08%)                        | 2 (0.01%)                        | 2.57E-05                   | 8.14E-05                   | 8.83      | 2.37-73.97    | 0.09%                   |
| *15:02          | 3515 (3.06%)                      | 825 (3.65%)                      | 1.30E-05                   | 4.96E-05                   | 0.84      | 0.78-0.91     | 4.06%                   |
| *16:02          | 28 (0.02%)                        | 2 (0.01%)                        | 2.16E-01                   | 3.42E-01                   | 2.78      | 0.7-24.06     | 0.13%                   |

<sup>a</sup>P value for Fisher's exact test.

<sup>b</sup>Q value for FDR-BH adjustment.

**Table S7.9. Results of HLA-C subtypes significantly associated with HCV infection in the Taiwanese population.** Abbreviations: OR, odds ratio; CI, confidence interval; N, allele number; NA, not available.

| <i>Genotype</i> | <i>HCVab-</i><br><i>N=113,974</i> | <i>HCVab+</i><br><i>N=10,048</i> | <i>P-value<sup>a</sup></i> | <i>Q-value<sup>b</sup></i> | <i>OR</i> | <i>95% CI</i> | <i>Allele Frequency</i> |
|-----------------|-----------------------------------|----------------------------------|----------------------------|----------------------------|-----------|---------------|-------------------------|
| *01:02          | 18614 (16.33%)                    | 1605 (15.97%)                    | 2.66E-01                   | 7.21E-01                   | 1.03      | 0.98-1.09     | 20.08%                  |
| *02:02          | 1 (0%)                            | 0 (0%)                           | NA                         | NA                         | NA        | NA            | 0.11%                   |
| *03:02          | 10796 (9.47%)                     | 1076 (10.71%)                    | 9.32E-05                   | 1.77E-03                   | 0.87      | 0.82-0.93     | 10.80%                  |

|        |                |               |          |          |      |           |        |
|--------|----------------|---------------|----------|----------|------|-----------|--------|
| *03:03 | 3905 (3.43%)   | 356 (3.54%)   | 5.86E-01 | 1.11E+00 | 0.97 | 0.87-1.09 | 4.91%  |
| *03:04 | 11423 (10.02%) | 1064 (10.59%) | 8.89E-02 | 4.22E-01 | 0.94 | 0.88-1.01 | 12.70% |
| *04:01 | 3147 (2.76%)   | 271 (2.7%)    | 6.79E-01 | 1.07E+00 | 1.03 | 0.91-1.17 | 3.80%  |
| *04:03 | 1626 (1.43%)   | 135 (1.34%)   | 5.09E-01 | 1.21E+00 | 1.07 | 0.89-1.28 | 1.73%  |
| *04:82 | 486 (0.43%)    | 44 (0.44%)    | 8.73E-01 | 1.19E+00 | 0.98 | 0.72-1.36 | 0.64%  |
| *06:02 | 1999 (1.75%)   | 185 (1.84%)   | 5.53E-01 | 1.17E+00 | 0.96 | 0.82-1.12 | 2.06%  |
| *07:02 | 18844 (16.53%) | 1678 (16.7%)  | 7.85E-01 | 1.15E+00 | 0.99 | 0.94-1.05 | 21.20% |
| *07:04 | 427 (0.37%)    | 22 (0.22%)    | 9.32E-03 | 5.90E-02 | 1.72 | 1.12-2.78 | 0.66%  |
| *07:06 | 149 (0.13%)    | 13 (0.13%)    | 1.00E+00 | 1.27E+00 | 1.01 | 0.58-1.95 | 0.19%  |
| *08:01 | 5797 (5.09%)   | 453 (4.51%)   | 7.91E-03 | 7.51E-02 | 1.14 | 1.03-1.26 | 7.55%  |
| *12:02 | 4330 (3.8%)    | 353 (3.51%)   | 1.32E-01 | 4.17E-01 | 1.09 | 0.98-1.22 | 4.15%  |
| *12:03 | 714 (0.63%)    | 58 (0.58%)    | 5.97E-01 | 1.03E+00 | 1.09 | 0.83-1.45 | 0.92%  |
| *14:02 | 3327 (2.92%)   | 294 (2.93%)   | 1.00E+00 | 1.27E+00 | 1    | 0.89-1.13 | 3.51%  |
| *14:03 | 72 (0.06%)     | 6 (0.06%)     | 1.00E+00 | 1.27E+00 | 1.06 | 0.46-2.99 | 0.09%  |
| *15:02 | 3664 (3.21%)   | 293 (2.92%)   | 9.05E-02 | 3.44E-01 | 1.11 | 0.98-1.26 | 4.06%  |
| *16:02 | 27 (0.02%)     | 2 (0.02%)     | 1.00E+00 | 1.27E+00 | 1.19 | 0.3-10.37 | 0.13%  |

<sup>a</sup>P value for Fisher's exact test.

<sup>b</sup>Q value for FDR-BH adjustment.

**Table S7.10. Results of HLA-DPA1 subtypes significantly associated with HCC in the Taiwanese population.** Abbreviations: OR, odds ratio; CI, confidence interval; N, allele number.

| <i>Genotype</i> | <i>Control</i><br><i>N=241,306</i> | <i>Case</i><br><i>N=5,858</i> | <i>P-value<sup>a</sup></i> | <i>Q-value<sup>b</sup></i> | <i>OR</i> | <i>95% CI</i> | <i>Allele Frequency</i> |
|-----------------|------------------------------------|-------------------------------|----------------------------|----------------------------|-----------|---------------|-------------------------|
| *01:03          | 66546 (27.58%)                     | 1484 (25.33%)                 | 9.95E-05                   | 1.99E-04                   | 1.13      | 1.06-1.2      | 27.75%                  |
| *02:01          | 16511 (6.84%)                      | 387 (6.61%)                   | 4.79E-01                   | 6.39E-01                   | 1.04      | 0.94-1.16     | 7.56%                   |
| *02:02          | 147230 (61.01%)                    | 3725 (63.59%)                 | 8.18E-05                   | 3.27E-04                   | 0.9       | 0.85-0.95     | 61.89%                  |
| *04:01          | 6263 (2.6%)                        | 154 (2.63%)                   | 8.68E-01                   | 8.68E-01                   | 0.99      | 0.84-1.17     | 2.81%                   |

<sup>a</sup>P value for Fisher's exact test.

<sup>b</sup>Q value for FDR-BH adjustment.

**Table S7.11. Results of HLA-DPA1 subtypes significantly associated with HBV infection in the Taiwanese population.** Abbreviations: OR, odds ratio; CI, confidence interval; N, allele number.

| <i>Genotype</i> | <i>HBsAg-</i><br><i>N=114,898</i> | <i>HBsAg+</i><br><i>N=22,632</i> | <i>P-value<sup>a</sup></i> | <i>Q-value<sup>b</sup></i> | <i>OR</i> | <i>95% CI</i> | <i>Allele Frequency</i> |
|-----------------|-----------------------------------|----------------------------------|----------------------------|----------------------------|-----------|---------------|-------------------------|
| *01:03          | 32061 (27.9%)                     | 4897 (21.64%)                    | 1.30E-86                   | 2.60E-86                   | 1.4       | 1.35-1.45     | 27.75%                  |
| *02:01          | 7933 (6.9%)                       | 1314 (5.81%)                     | 1.31E-09                   | 1.75E-09                   | 1.2       | 1.13-1.28     | 7.56%                   |
| *02:02          | 69750 (60.71%)                    | 15266 (67.45%)                   | 2.24E-88                   | 8.94E-88                   | 0.73      | 0.71-0.76     | 61.89%                  |
| *04:01          | 2888 (2.51%)                      | 671 (2.96%)                      | 1.06E-04                   | 1.06E-04                   | 0.84      | 0.77-0.92     | 2.81%                   |

<sup>a</sup>P value for Fisher's exact test.

<sup>b</sup>Q value for FDR-BH adjustment.

**Table S7.12. Results of HLA-DPA1 subtypes significantly associated with HCV infection in the Taiwanese population.** Abbreviations: OR, odds ratio; CI, confidence interval; N, allele number.

| <i>Genotype</i> | <i>HCVab-</i><br><i>N=113,974</i> | <i>HCVab+</i><br><i>N=10,048</i> | <i>P-value</i> <sup>a</sup> | <i>Q-value</i> <sup>b</sup> | <i>OR</i> | <i>95% CI</i> | <i>Allele Frequency</i> |
|-----------------|-----------------------------------|----------------------------------|-----------------------------|-----------------------------|-----------|---------------|-------------------------|
| *01:03          | 30443 (26.71%)                    | 2806 (27.93%)                    | 1.29E-02                    | 5.18E-02                    | 0.94      | 0.9-0.99      | 27.75%                  |
| *02:01          | 7639 (6.7%)                       | 683 (6.8%)                       | 7.55E-01                    | 7.55E-01                    | 0.99      | 0.91-1.07     | 7.56%                   |
| *02:02          | 70644 (61.98%)                    | 6143 (61.14%)                    | 4.52E-02                    | 9.04E-02                    | 1.04      | 1-1.09        | 61.89%                  |
| *04:01          | 2976 (2.61%)                      | 240 (2.39%)                      | 1.80E-01                    | 2.40E-01                    | 1.1       | 0.96-1.26     | 2.81%                   |

<sup>a</sup>P value for Fisher's exact test.

<sup>b</sup>Q value for FDR-BH adjustment.

**Table S7.13. Results of HLA-DPB1 subtypes significantly associated with HCC in the Taiwanese population.** Abbreviations: OR, odds ratio; CI, confidence interval; N, allele number; NA, not available.

| <i>Genotype</i> | <i>Control</i><br><i>N=241,306</i> | <i>Case</i><br><i>N=5,858</i> | <i>P-value</i> <sup>a</sup> | <i>Q-value</i> <sup>b</sup> | <i>OR</i> | <i>95% CI</i> | <i>Allele Frequency</i> |
|-----------------|------------------------------------|-------------------------------|-----------------------------|-----------------------------|-----------|---------------|-------------------------|
| *01:01          | 55 (0.02%)                         | 1 (0.02%)                     | 1.00E+00                    | 1.08E+00                    | 1.37      | 0.24-55.13    | 0.21%                   |
| *02:01          | 25815 (10.70%)                     | 568 (9.70%)                   | 1.35E-03                    | 9.45E-03                    | 1.16      | 1.06-1.27     | 15.29%                  |
| *02:02          | 10848 (4.50%)                      | 242 (4.13%)                   | 8.00E-02                    | 2.80E-01                    | 1.12      | 0.99-1.29     | 7.33%                   |
| *03:01          | 7889 (3.27%)                       | 177 (3.02%)                   | 1.71E-01                    | 3.42E-01                    | 1.12      | 0.96-1.31     | 4.74%                   |
| *04:01          | 14239 (5.90%)                      | 346 (5.91%)                   | 6.54E-01                    | 9.15E-01                    | 1.03      | 0.92-1.15     | 7.77%                   |
| *04:02          | 2640 (1.09%)                       | 47 (0.80%)                    | 1.93E-02                    | 9.03E-02                    | 1.41      | 1.05-1.92     | 1.76%                   |
| *05:01          | 87978 (36.46%)                     | 2347 (40.06%)                 | 3.72E-06                    | 5.21E-05                    | 0.87      | 0.82-0.92     | 45.15%                  |
| *09:01          | 2334 (0.97%)                       | 45 (0.77%)                    | 9.34E-02                    | 2.61E-01                    | 1.30      | 0.96-1.79     | 1.38%                   |
| *104:01         | 194 (0.08%)                        | 4 (0.07%)                     | 1.00E+00                    | 1.08E+00                    | 1.21      | 0.46-4.48     | 0.32%                   |
| *13:01          | 11341 (4.70%)                      | 309 (5.27%)                   | 1.13E-01                    | 2.63E-01                    | 0.91      | 0.81-1.03     | 6.66%                   |
| *135:01         | 2 (0.0008%)                        | 0 (0%)                        | NA                          | NA                          | NA        | NA            | 2.51%                   |
| *14:01          | 3576 (1.48%)                       | 83 (1.42%)                    | 5.51E-01                    | 8.57E-01                    | 1.08      | 0.86-1.36     | 2.56%                   |
| *17:01          | 1914 (0.79%)                       | 39 (0.67%)                    | 2.37E-01                    | 4.14E-01                    | 1.23      | 0.89-1.73     | 0.90%                   |
| *19:01          | 2669 (1.11%)                       | 69 (1.18%)                    | 7.54E-01                    | 9.60E-01                    | 0.96      | 0.76-1.24     | 1.33%                   |
| *21:01          | 2734 (1.13%)                       | 65 (1.11%)                    | 7.57E-01                    | 8.83E-01                    | 1.05      | 0.82-1.37     | 1.79%                   |

<sup>a</sup>P value for Fisher's exact test.

<sup>b</sup>Q value for FDR-BH adjustment.

**Table S7.14. Results of HLA-DPB1 subtypes significantly associated with HBV infection in the Taiwanese population.** Abbreviations: OR, odds ratio; CI, confidence interval; N, allele number; NA, not available.

| <i>Genotype</i> | <i>HBSag-</i><br><i>N=114,898</i> | <i>HBSag+</i><br><i>N=22,632</i> | <i>P-value</i> <sup>a</sup> | <i>Q-value</i> <sup>b</sup> | <i>OR</i> | <i>95% CI</i> | <i>Allele Frequency</i> |
|-----------------|-----------------------------------|----------------------------------|-----------------------------|-----------------------------|-----------|---------------|-------------------------|
| *01:01          | 22 (0.02%)                        | 3 (0.01%)                        | 7.89E-01                    | 7.89E-01                    | 1.50      | 0.45-7.81     | 0.21%                   |
| *02:01          | 12517 (10.89%)                    | 1983 (8.76%)                     | 5.25E-31                    | 2.45E-30                    | 1.34      | 1.27-1.41     | 15.29%                  |
| *02:02          | 5312 (4.62%)                      | 696 (3.08%)                      | 9.26E-33                    | 6.48E-32                    | 1.59      | 1.47-1.73     | 7.33%                   |

|         |                |                |           |           |      |            |        |
|---------|----------------|----------------|-----------|-----------|------|------------|--------|
| *03:01  | 3903 (3.40%)   | 581 (2.57%)    | 7.03E-14  | 1.41E-13  | 1.39 | 1.27-1.52  | 4.74%  |
| *04:01  | 6770 (5.89%)   | 980 (4.33%)    | 1.98E-27  | 6.94E-27  | 1.45 | 1.35-1.55  | 7.77%  |
| *04:02  | 1284 (1.12%)   | 185 (0.82%)    | 4.26E-06  | 6.63E-06  | 1.42 | 1.22-1.67  | 1.76%  |
| *05:01  | 41503 (36.12%) | 10002 (44.19%) | 1.11E-103 | 1.56E-102 | 0.69 | 0.67-0.72  | 45.15% |
| *09:01  | 1149 (1.00%)   | 113 (0.50%)    | 3.00E-16  | 8.39E-16  | 2.09 | 1.72-2.56  | 1.38%  |
| *104:01 | 94 (0.08%)     | 2 (0.01%)      | 7.32E-06  | 1.03E-05  | 9.59 | 2.58-80.39 | 0.32%  |
| *13:01  | 5191 (4.52%)   | 1347 (5.95%)   | 1.55E-15  | 3.61E-15  | 0.77 | 0.72-0.82  | 6.66%  |
| *135:01 | 2 (0.002%)     | 0 (0%)         | NA        | NA        | NA   | NA         | 2.51%  |
| *14:01  | 1759 (1.53%)   | 300 (1.33%)    | 3.61E-03  | 4.21E-03  | 1.20 | 1.06-1.36  | 2.56%  |
| *17:01  | 909 (0.79%)    | 98 (0.43%)     | 8.31E-11  | 1.45E-10  | 1.90 | 1.54-2.37  | 0.90%  |
| *19:01  | 1241 (1.08%)   | 332 (1.47%)    | 1.64E-05  | 2.09E-05  | 0.76 | 0.67-0.86  | 1.33%  |
| *21:01  | 1310 (1.14%)   | 298 (1.32%)    | 8.74E-02  | 9.41E-02  | 0.89 | 0.79-1.02  | 1.79%  |

<sup>a</sup>P value for Fisher's exact test.

<sup>b</sup>Q value for FDR-BH adjustment.

**Table S7.15. Results of HLA-DPB1 subtypes significantly associated with HCV infection in the Taiwanese population.** Abbreviations: OR, odds ratio; CI, confidence interval; N, allele number; NA, not available.

| <i>Genotype</i> | <i>HCVab-<br/>N=113,974</i> | <i>HCVab+<br/>N=10,048</i> | <i>P-value<sup>a</sup></i> | <i>Q-value<sup>b</sup></i> | <i>OR</i> | <i>95% CI</i> | <i>Allele<br/>Frequency</i> |
|-----------------|-----------------------------|----------------------------|----------------------------|----------------------------|-----------|---------------|-----------------------------|
| *01:01          | 19 (0.02%)                  | 3 (0.03%)                  | 4.20E-01                   | 4.90E-01                   | 0.56      | 0.17-2.98     | 0.21%                       |
| *02:01          | 11991 (10.52%)              | 1103 (10.98%)              | 2.85E-01                   | 4.43E-01                   | 0.96      | 0.90-1.03     | 15.29%                      |
| *02:02          | 4911 (4.31%)                | 483 (4.81%)                | 3.57E-02                   | 9.99E-02                   | 0.90      | 0.82-0.99     | 7.33%                       |
| *03:01          | 3702 (3.25%)                | 336 (3.34%)                | 7.47E-01                   | 7.47E-01                   | 0.98      | 0.88-1.10     | 4.74%                       |
| *04:01          | 6334 (5.56%)                | 628 (6.25%)                | 8.86E-03                   | 1.24E-01                   | 0.89      | 0.82-0.97     | 7.77%                       |
| *04:02          | 1173 (1.03%)                | 114 (1.13%)                | 3.84E-01                   | 4.88E-01                   | 0.92      | 0.75-1.12     | 1.76%                       |
| *05:01          | 42827 (37.58%)              | 3704 (36.86%)              | 1.10E-02                   | 7.73E-02                   | 1.06      | 1.01-1.12     | 45.15%                      |
| *09:01          | 1022 (0.90%)                | 107 (1.06%)                | 1.13E-01                   | 2.64E-01                   | 0.85      | 0.69-1.05     | 1.38%                       |
| *104:01         | 75 (0.07%)                  | 14 (0.14%)                 | 1.77E-02                   | 8.26E-02                   | 0.48      | 0.27-0.91     | 0.32%                       |
| *13:01          | 5486 (4.81%)                | 438 (4.36%)                | 2.12E-02                   | 7.41E-02                   | 1.13      | 1.02-1.25     | 6.66%                       |
| *135:01         | 0 (0%)                      | 0 (0%)                     | NA                         | NA                         | NA        | NA            | 2.51%                       |
| *14:01          | 1719 (1.51%)                | 140 (1.39%)                | 3.25E-01                   | 4.55E-01                   | 1.10      | 0.92-1.31     | 2.56%                       |
| *17:01          | 810 (0.71%)                 | 86 (0.86%)                 | 1.25E-01                   | 2.51E-01                   | 0.84      | 0.67-1.06     | 0.90%                       |
| *19:01          | 1319 (1.16%)                | 105 (1.04%)                | 2.84E-01                   | 4.96E-01                   | 1.12      | 0.92-1.38     | 1.33%                       |
| *21:01          | 1342 (1.18%)                | 115 (1.14%)                | 7.36E-01                   | 7.92E-01                   | 1.04      | 0.86-1.27     | 1.79%                       |

<sup>a</sup>P value for Fisher's exact test.

<sup>b</sup>Q value for FDR-BH adjustment.

**Table S7.16. Results of HLA-DQA1 subtypes significantly associated with HCC in the Taiwanese population.** Abbreviations: OR, odds ratio; CI, confidence interval; N, allele number; NA, not available.

| <i>Genotype</i> | <i>Control<br/>N=241,306</i> | <i>Case<br/>N=5,858</i> | <i>P-value<sup>a</sup></i> | <i>Q-value<sup>b</sup></i> | <i>OR</i> | <i>95% CI</i> | <i>Allele<br/>Frequency</i> |
|-----------------|------------------------------|-------------------------|----------------------------|----------------------------|-----------|---------------|-----------------------------|
|-----------------|------------------------------|-------------------------|----------------------------|----------------------------|-----------|---------------|-----------------------------|

|        |                |              |          |          |      |           |        |
|--------|----------------|--------------|----------|----------|------|-----------|--------|
| *01:01 | 3455 (1.43%)   | 94 (1.6%)    | 2.92E-01 | 5.47E-01 | 0.9  | 0.73-1.11 | 1.97%  |
| *01:02 | 36028 (14.93%) | 773 (13.2%)  | 6.70E-05 | 3.35E-04 | 1.17 | 1.08-1.26 | 16.45% |
| *01:03 | 20562 (8.52%)  | 510 (8.71%)  | 7.21E-01 | 8.32E-01 | 0.98 | 0.9-1.08  | 9.23%  |
| *01:04 | 15020 (6.22%)  | 424 (7.24%)  | 2.82E-03 | 8.45E-03 | 0.85 | 0.77-0.95 | 7.05%  |
| *01:05 | 2158 (0.89%)   | 56 (0.96%)   | 6.24E-01 | 7.80E-01 | 0.94 | 0.72-1.25 | 1.08%  |
| *02:01 | 4183 (1.73%)   | 101 (1.72%)  | 9.60E-01 | 1.03E+00 | 1.01 | 0.83-1.25 | 2.15%  |
| *03:01 | 13708 (5.68%)  | 263 (4.49%)  | 3.55E-05 | 2.66E-04 | 1.29 | 1.14-1.47 | 7.35%  |
| *03:02 | 33268 (13.79%) | 785 (13.4%)  | 3.04E-01 | 5.07E-01 | 1.04 | 0.96-1.13 | 15.29% |
| *03:03 | 12600 (5.22%)  | 271 (4.63%)  | 3.18E-02 | 7.95E-02 | 1.14 | 1.01-1.3  | 7.94%  |
| *04:01 | 2438 (1.01%)   | 35 (0.6%)    | 8.81E-04 | 3.30E-03 | 1.71 | 1.22-2.46 | 1.19%  |
| *05:01 | 17825 (7.39%)  | 449 (7.66%)  | 5.10E-01 | 6.95E-01 | 0.97 | 0.88-1.07 | 8.23%  |
| *05:03 | 32 (0.01%)     | 0 (0%)       | NA       | NA       | NA   | NA        | 0.63%  |
| *05:05 | 23587 (9.77%)  | 597 (10.19%) | 3.70E-01 | 5.55E-01 | 0.96 | 0.88-1.05 | 11.44% |
| *05:08 | 999 (0.41%)    | 31 (0.53%)   | 1.83E-01 | 3.92E-01 | 0.79 | 0.55-1.16 | 0.80%  |
| *06:01 | 20085 (8.32%)  | 643 (10.98%) | 7.72E-12 | 1.16E-10 | 0.74 | 0.68-0.8  | 9.20%  |

<sup>a</sup>P value for Fisher's exact test.

<sup>b</sup>Q value for FDR-BH adjustment.

**Table S7.17. Results of HLA-DQA1 haplotypes significantly associated with HBV infection in the Taiwanese population.** Abbreviations: OR, odds ratio; CI, confidence interval; N, allele number.

| <i>Genotype</i> | <i>HBSag-</i><br><i>N=114,898</i> | <i>HBSag+</i><br><i>N=22,632</i> | <i>P-value<sup>a</sup></i> | <i>Q-value<sup>b</sup></i> | <i>OR</i> | <i>95% CI</i> | <i>Allele Frequency</i> |
|-----------------|-----------------------------------|----------------------------------|----------------------------|----------------------------|-----------|---------------|-------------------------|
| *01:01          | 1682 (1.46%)                      | 280 (1.24%)                      | 1.73E-03                   | 2.60E-03                   | 1.22      | 1.08-1.39     | 1.97%                   |
| *01:02          | 17433 (15.17%)                    | 2835 (12.53%)                    | 1.52E-34                   | 7.58E-34                   | 1.3       | 1.25-1.36     | 16.45%                  |
| *01:03          | 9821 (8.55%)                      | 1971 (8.71%)                     | 6.50E-01                   | 7.50E-01                   | 1.01      | 0.96-1.07     | 9.23%                   |
| *01:04          | 7130 (6.21%)                      | 1764 (7.79%)                     | 2.54E-14                   | 6.36E-14                   | 0.81      | 0.76-0.85     | 7.05%                   |
| *01:05          | 1043 (0.91%)                      | 137 (0.61%)                      | 5.30E-07                   | 9.94E-07                   | 1.55      | 1.3-1.87      | 1.08%                   |
| *02:01          | 1995 (1.74%)                      | 235 (1.04%)                      | 1.71E-17                   | 5.14E-17                   | 1.74      | 1.52-2        | 2.15%                   |
| *03:01          | 6563 (5.71%)                      | 762 (3.37%)                      | 1.48E-58                   | 2.22E-57                   | 1.8       | 1.67-1.95     | 7.35%                   |
| *03:02          | 15610 (13.59%)                    | 3711 (16.4%)                     | 7.41E-21                   | 2.78E-20                   | 0.83      | 0.79-0.86     | 15.29%                  |
| *03:03          | 6147 (5.35%)                      | 1259 (5.56%)                     | 7.49E-01                   | 8.02E-01                   | 0.99      | 0.93-1.05     | 7.94%                   |
| *04:01          | 1130 (0.98%)                      | 190 (0.84%)                      | 1.62E-02                   | 2.03E-02                   | 1.21      | 1.04-1.42     | 1.19%                   |
| *05:01          | 8407 (7.32%)                      | 1514 (6.69%)                     | 6.85E-06                   | 1.14E-05                   | 1.14      | 1.08-1.21     | 8.23%                   |
| *05:03          | 13 (0.01%)                        | 2 (0.01%)                        | 1.00E+00                   | 1.00E+00                   | 1.32      | 0.3-12.04     | 0.63%                   |
| *05:05          | 10891 (9.48%)                     | 2503 (11.06%)                    | 3.43E-09                   | 7.36E-09                   | 0.87      | 0.83-0.91     | 11.44%                  |
| *05:08          | 454 (0.4%)                        | 127 (0.56%)                      | 1.83E-03                   | 2.50E-03                   | 0.72      | 0.59-0.89     | 0.80%                   |
| *06:01          | 9493 (8.26%)                      | 2554 (11.28%)                    | 6.91E-39                   | 5.18E-38                   | 0.73      | 0.69-0.76     | 9.20%                   |

<sup>a</sup>P value for Fisher's exact test.

<sup>b</sup>Q value for FDR-BH adjustment.

**Table S7.18. Results of HLA-DQA1 subtypes significantly associated with HCV infection in the Taiwanese population.** Abbreviations: OR, odds ratio; CI, confidence interval; N, allele number.

| <i>Genotype</i> | <i>HCVab-</i><br><i>N=113,974</i> | <i>HCVab+</i><br><i>N=10,048</i> | <i>P-value</i> <sup>a</sup> | <i>Q-value</i> <sup>b</sup> | <i>OR</i> | <i>95% CI</i> | <i>Allele Frequency</i> |
|-----------------|-----------------------------------|----------------------------------|-----------------------------|-----------------------------|-----------|---------------|-------------------------|
| *01:01          | 1603 (1.41%)                      | 148 (1.47%)                      | 5.36E-01                    | 6.70E-01                    | 0.95      | 0.8-1.13      | 1.97%                   |
| *01:02          | 16742 (14.69%)                    | 1529 (15.22%)                    | 1.04E-01                    | 3.11E-01                    | 0.95      | 0.9-1.01      | 16.45%                  |
| *01:03          | 9807 (8.6%)                       | 807 (8.03%)                      | 6.56E-02                    | 2.46E-01                    | 1.07      | 1-1.16        | 9.23%                   |
| *01:04          | 7354 (6.45%)                      | 664 (6.61%)                      | 4.68E-01                    | 6.39E-01                    | 0.97      | 0.89-1.05     | 7.05%                   |
| *01:05          | 975 (0.86%)                       | 100 (1%)                         | 1.43E-01                    | 3.06E-01                    | 0.85      | 0.69-1.06     | 1.08%                   |
| *02:01          | 1817 (1.59%)                      | 191 (1.9%)                       | 1.83E-02                    | 1.37E-01                    | 0.83      | 0.71-0.97     | 2.15%                   |
| *03:01          | 6067 (5.32%)                      | 552 (5.49%)                      | 4.01E-01                    | 6.69E-01                    | 0.96      | 0.88-1.05     | 7.35%                   |
| *03:02          | 16056 (14.09%)                    | 1357 (13.51%)                    | 1.48E-01                    | 2.78E-01                    | 1.05      | 0.98-1.11     | 15.29%                  |
| *03:03          | 6141 (5.39%)                      | 527 (5.24%)                      | 6.26E-01                    | 7.22E-01                    | 1.02      | 0.93-1.12     | 7.94%                   |
| *04:01          | 1098 (0.96%)                      | 88 (0.88%)                       | 4.53E-01                    | 6.79E-01                    | 1.1       | 0.88-1.38     | 1.19%                   |
| *05:01          | 8138 (7.14%)                      | 800 (7.96%)                      | 1.54E-03                    | 2.32E-02                    | 0.88      | 0.82-0.95     | 8.23%                   |
| *05:03          | 13 (0.01%)                        | 1 (0.01%)                        | 1.00E+00                    | 1.00E+00                    | 1.14      | 0.17-48.49    | 0.63%                   |
| *05:05          | 11166 (9.8%)                      | 931 (9.27%)                      | 1.14E-01                    | 2.86E-01                    | 1.06      | 0.99-1.14     | 11.44%                  |
| *05:08          | 477 (0.42%)                       | 44 (0.44%)                       | 7.47E-01                    | 8.00E-01                    | 0.95      | 0.7-1.33      | 0.80%                   |
| *06:01          | 10086 (8.85%)                     | 821 (8.17%)                      | 2.85E-02                    | 1.43E-01                    | 1.09      | 1.01-1.17     | 9.20%                   |

<sup>a</sup>P value for Fisher's exact test.

<sup>b</sup>Q value for FDR-BH adjustment.

**Table S7.19. Results of HLA-DQB1 subtypes significantly associated with HCC in the Taiwanese population.** Abbreviations: OR, odds ratio; CI, confidence interval; N, allele number.

| <i>Genotype</i> | <i>Control</i><br><i>N=241,306</i> | <i>Case</i><br><i>N=5,858</i> | <i>P-value</i> <sup>a</sup> | <i>Q-value</i> <sup>b</sup> | <i>OR</i> | <i>95% CI</i> | <i>Allele Frequency</i> |
|-----------------|------------------------------------|-------------------------------|-----------------------------|-----------------------------|-----------|---------------|-------------------------|
| *02:01          | 18903 (7.83%)                      | 477 (8.14%)                   | 4.02E-01                    | 5.48E-01                    | 0.96      | 0.87-1.06     | 8.22%                   |
| *02:02          | 4325 (1.79%)                       | 108 (1.84%)                   | 7.65E-01                    | 8.83E-01                    | 0.97      | 0.8-1.19      | 1.93%                   |
| *03:01          | 50703 (21.01%)                     | 1445 (24.67%)                 | 2.89E-11                    | 4.34E-10                    | 0.81      | 0.76-0.86     | 22.38%                  |
| *03:02          | 17987 (7.45%)                      | 331 (5.65%)                   | 5.91E-08                    | 4.43E-07                    | 1.35      | 1.21-1.51     | 7.93%                   |
| *03:03          | 35412 (14.68%)                     | 818 (13.96%)                  | 1.14E-01                    | 2.45E-01                    | 1.06      | 0.99-1.15     | 15.51%                  |
| *04:01          | 15231 (6.31%)                      | 361 (6.16%)                   | 6.43E-01                    | 8.04E-01                    | 1.03      | 0.92-1.15     | 7.06%                   |
| *04:02          | 2357 (0.98%)                       | 34 (0.58%)                    | 1.44E-03                    | 4.33E-03                    | 1.69      | 1.21-2.45     | 1.21%                   |
| *05:01          | 5175 (2.14%)                       | 138 (2.36%)                   | 2.74E-01                    | 5.13E-01                    | 0.91      | 0.77-1.09     | 2.59%                   |
| *05:02          | 22449 (9.3%)                       | 588 (10.04%)                  | 6.13E-02                    | 1.53E-01                    | 0.92      | 0.84-1.01     | 10.02%                  |
| *05:03          | 9312 (3.86%)                       | 227 (3.88%)                   | 9.73E-01                    | 9.73E-01                    | 1         | 0.87-1.15     | 4.51%                   |
| *06:01          | 27786 (11.51%)                     | 669 (11.42%)                  | 8.03E-01                    | 8.60E-01                    | 1.01      | 0.93-1.1      | 12.00%                  |
| *06:02          | 8287 (3.43%)                       | 148 (2.53%)                   | 8.15E-05                    | 4.08E-04                    | 1.38      | 1.17-1.63     | 3.89%                   |
| *06:03          | 523 (0.22%)                        | 9 (0.15%)                     | 3.90E-01                    | 5.85E-01                    | 1.41      | 0.74-3.11     | 0.37%                   |
| *06:04          | 150 (0.06%)                        | 1 (0.02%)                     | 2.75E-01                    | 4.59E-01                    | 3.65      | 0.64-145.05   | 0.14%                   |
| *06:09          | 4624 (1.92%)                       | 74 (1.26%)                    | 1.53E-04                    | 5.75E-04                    | 1.53      | 1.21-1.96     | 2.04%                   |

<sup>a</sup>P value for Fisher's exact test.

<sup>b</sup>Q value for FDR-BH adjustment.

**Table S7.20. Results of HLA-DQB1 subtypes significantly associated with HBV infection in the Taiwanese population.** Abbreviations: OR, odds ratio; CI, confidence interval; N, allele number.

| <i>Genotype</i> | <i>HBSag-</i><br><i>N=114,898</i> | <i>HBSag+</i><br><i>N=22,632</i> | <i>P-value</i> <sup>a</sup> | <i>Q-value</i> <sup>b</sup> | <i>OR</i> | <i>95% CI</i> | <i>Allele Frequency</i> |
|-----------------|-----------------------------------|----------------------------------|-----------------------------|-----------------------------|-----------|---------------|-------------------------|
| *02:01          | 8904 (7.75%)                      | 1587 (7.01%)                     | 1.05E-05                    | 1.58E-05                    | 1.13      | 1.07-1.2      | 8.22%                   |
| *02:02          | 2061 (1.79%)                      | 246 (1.09%)                      | 2.27E-16                    | 5.67E-16                    | 1.69      | 1.48-1.93     | 1.93%                   |
| *03:01          | 23529 (20.48%)                    | 5766 (25.48%)                    | 4.45E-55                    | 2.22E-54                    | 0.76      | 0.74-0.79     | 22.38%                  |
| *03:02          | 8702 (7.57%)                      | 956 (4.22%)                      | 4.48E-86                    | 6.72E-85                    | 1.89      | 1.77-2.03     | 7.93%                   |
| *03:03          | 16646 (14.49%)                    | 3905 (17.25%)                    | 2.05E-22                    | 7.67E-22                    | 0.82      | 0.79-0.86     | 15.51%                  |
| *04:01          | 7489 (6.52%)                      | 1468 (6.49%)                     | 4.99E-01                    | 4.99E-01                    | 1.02      | 0.96-1.08     | 7.06%                   |
| *04:02          | 1085 (0.94%)                      | 182 (0.8%)                       | 2.79E-02                    | 3.22E-02                    | 1.19      | 1.02-1.4      | 1.21%                   |
| *05:01          | 2508 (2.18%)                      | 376 (1.66%)                      | 6.97E-08                    | 1.16E-07                    | 1.34      | 1.2-1.5       | 2.59%                   |
| *05:02          | 10831 (9.43%)                     | 2454 (10.84%)                    | 4.02E-09                    | 7.53E-09                    | 0.87      | 0.83-0.91     | 10.02%                  |
| *05:03          | 4417 (3.84%)                      | 979 (4.33%)                      | 2.98E-03                    | 3.73E-03                    | 0.9       | 0.84-0.96     | 4.51%                   |
| *06:01          | 13257 (11.54%)                    | 2576 (11.38%)                    | 1.71E-01                    | 1.84E-01                    | 1.03      | 0.99-1.08     | 12.00%                  |
| *06:02          | 3967 (3.45%)                      | 537 (2.37%)                      | 1.88E-19                    | 5.65E-19                    | 1.49      | 1.36-1.64     | 3.89%                   |
| *06:03          | 253 (0.22%)                       | 11 (0.05%)                       | 4.64E-10                    | 9.95E-10                    | 4.6       | 2.53-9.34     | 0.37%                   |
| *06:04          | 70 (0.06%)                        | 3 (0.01%)                        | 2.33E-03                    | 3.18E-03                    | 4.66      | 1.53-23.16    | 0.14%                   |
| *06:09          | 2315 (2.01%)                      | 136 (0.6%)                       | 1.73E-63                    | 1.30E-62                    | 3.45      | 2.9-4.14      | 2.04%                   |

<sup>a</sup>P value for Fisher's exact test.

<sup>b</sup>Q value for FDR-BH adjustment.

**Table S7.21. Results of HLA-DQB1 subtypes significantly associated with HCV infection in the Taiwanese population.** Abbreviations: OR, odds ratio; CI, confidence interval; N, allele number.

| <i>Genotype</i> | <i>HCVab-</i><br><i>N=113,974</i> | <i>HCVab+</i><br><i>N=10,048</i> | <i>P-value</i> <sup>a</sup> | <i>Q-value</i> <sup>b</sup> | <i>OR</i> | <i>95% CI</i> | <i>Allele Frequency</i> |
|-----------------|-----------------------------------|----------------------------------|-----------------------------|-----------------------------|-----------|---------------|-------------------------|
| *02:01          | 8585 (7.53%)                      | 854 (8.5%)                       | 2.81E-04                    | 4.22E-03                    | 0.87      | 0.81-0.94     | 8.22%                   |
| *02:02          | 1879 (1.65%)                      | 193 (1.92%)                      | 3.77E-02                    | 1.41E-01                    | 0.85      | 0.73-0.99     | 1.93%                   |
| *03:01          | 24477 (21.48%)                    | 1993 (19.83%)                    | 2.83E-04                    | 2.12E-03                    | 1.1       | 1.04-1.16     | 22.38%                  |
| *03:02          | 7971 (6.99%)                      | 740 (7.36%)                      | 1.25E-01                    | 3.12E-01                    | 0.94      | 0.87-1.02     | 7.93%                   |
| *03:03          | 17055 (14.96%)                    | 1440 (14.33%)                    | 1.36E-01                    | 2.56E-01                    | 1.05      | 0.99-1.11     | 15.51%                  |
| *04:01          | 7424 (6.51%)                      | 690 (6.87%)                      | 1.28E-01                    | 2.74E-01                    | 0.94      | 0.87-1.02     | 7.06%                   |
| *04:02          | 1052 (0.92%)                      | 86 (0.86%)                       | 5.84E-01                    | 6.74E-01                    | 1.07      | 0.86-1.35     | 1.21%                   |
| *05:01          | 2375 (2.08%)                      | 219 (2.18%)                      | 4.66E-01                    | 6.35E-01                    | 0.95      | 0.83-1.1      | 2.59%                   |
| *05:02          | 10916 (9.58%)                     | 958 (9.53%)                      | 9.72E-01                    | 9.72E-01                    | 1         | 0.93-1.07     | 10.02%                  |
| *05:03          | 4475 (3.93%)                      | 398 (3.96%)                      | 7.67E-01                    | 8.22E-01                    | 0.99      | 0.89-1.1      | 4.51%                   |
| *06:01          | 13165 (11.55%)                    | 1095 (10.9%)                     | 7.58E-02                    | 2.28E-01                    | 1.06      | 0.99-1.13     | 12.00%                  |
| *06:02          | 3753 (3.29%)                      | 342 (3.4%)                       | 4.83E-01                    | 6.04E-01                    | 0.96      | 0.86-1.08     | 3.89%                   |
| *06:03          | 229 (0.2%)                        | 15 (0.15%)                       | 3.45E-01                    | 5.17E-01                    | 1.34      | 0.79-2.43     | 0.37%                   |



|        |              |             |          |          |      |           |       |
|--------|--------------|-------------|----------|----------|------|-----------|-------|
| *06:04 | 56 (0.05%)   | 8 (0.08%)   | 1.72E-01 | 2.87E-01 | 0.61 | 0.29-1.49 | 0.14% |
| *06:09 | 2036 (1.79%) | 213 (2.12%) | 1.52E-02 | 7.61E-02 | 0.83 | 0.72-0.97 | 2.04% |

<sup>a</sup>P value for Fisher's exact test.

<sup>b</sup>Q value for FDR-BH adjustment.

**Table S7.22. Results of HLA-DRB1 subtypes significantly associated with HCC in the Taiwanese population.** Abbreviations: OR, odds ratio; CI, confidence interval; N, allele number.

| <i>Genotype</i> | <i>Control</i><br><i>N=241,306</i> | <i>Case</i><br><i>N=5,858</i> | <i>P-value<sup>a</sup></i> | <i>Q-value<sup>b</sup></i> | <i>OR</i> | <i>95% CI</i> | <i>Allele Frequency</i> |
|-----------------|------------------------------------|-------------------------------|----------------------------|----------------------------|-----------|---------------|-------------------------|
| *01:01          | 863 (0.36%)                        | 19 (0.32%)                    | 5.90E-01                   | 7.87E-01                   | 1.18      | 0.75-1.98     | 0.45%                   |
| *03:01          | 16548 (6.86%)                      | 424 (7.24%)                   | 7.38E-01                   | 8.68E-01                   | 1.02      | 0.92-1.13     | 8.23%                   |
| *04:01          | 225 (0.09%)                        | 3 (0.05%)                     | 3.93E-01                   | 8.73E-01                   | 1.96      | 0.66-9.56     | 0.24%                   |
| *04:03          | 76 (0.03%)                         | 2 (0.03%)                     | 1.00E+00                   | 1.00E+00                   | 0.99      | 0.26-8.33     | 3.54%                   |
| *04:05          | 13628 (5.65%)                      | 324 (5.53%)                   | 9.17E-02                   | 2.62E-01                   | 1.1       | 0.98-1.24     | 7.55%                   |
| *07:01          | 4074 (1.69%)                       | 97 (1.66%)                    | 3.97E-01                   | 7.94E-01                   | 1.1       | 0.89-1.36     | 2.15%                   |
| *08:03          | 17337 (7.18%)                      | 463 (7.9%)                    | 5.79E-01                   | 8.28E-01                   | 0.97      | 0.88-1.08     | 8.65%                   |
| *08:09          | 32 (0.01%)                         | 1 (0.02%)                     | 5.72E-01                   | 8.80E-01                   | 0.83      | 0.14-33.96    | 1.10%                   |
| *09:01          | 29845 (12.37%)                     | 728 (12.43%)                  | 5.12E-02                   | 1.71E-01                   | 1.08      | 1-1.18        | 15.15%                  |
| *10:01          | 2015 (0.84%)                       | 57 (0.97%)                    | 5.27E-01                   | 8.78E-01                   | 0.92      | 0.71-1.22     | 1.08%                   |
| *11:01          | 13173 (5.46%)                      | 322 (5.5%)                    | 2.42E-01                   | 6.05E-01                   | 1.07      | 0.96-1.21     | 8.59%                   |
| *12:01          | 6117 (2.53%)                       | 209 (3.57%)                   | 1.48E-04                   | 9.88E-04                   | 0.75      | 0.65-0.87     | 4.05%                   |
| *12:02          | 19159 (7.94%)                      | 620 (10.58%)                  | 3.95E-08                   | 7.90E-07                   | 0.78      | 0.71-0.85     | 9.89%                   |
| *13:01          | 687 (0.28%)                        | 14 (0.24%)                    | 4.69E-01                   | 8.52E-01                   | 1.28      | 0.76-2.36     | 0.38%                   |
| *13:02          | 4394 (1.82%)                       | 76 (1.3%)                     | 1.66E-04                   | 8.28E-04                   | 1.52      | 1.21-1.94     | 2.18%                   |
| *14:05          | 3360 (1.39%)                       | 84 (1.43%)                    | 7.43E-01                   | 8.25E-01                   | 1.04      | 0.84-1.31     | 2.63%                   |
| *14:54          | 5521 (2.29%)                       | 197 (3.36%)                   | 2.22E-05                   | 2.22E-04                   | 0.72      | 0.62-0.84     | 4.26%                   |
| *15:01          | 14461 (5.99%)                      | 309 (5.27%)                   | 2.40E-04                   | 9.61E-04                   | 1.24      | 1.1-1.4       | 8.34%                   |
| *15:02          | 3162 (1.31%)                       | 87 (1.49%)                    | 6.12E-01                   | 7.65E-01                   | 0.95      | 0.76-1.19     | 1.90%                   |
| *16:02          | 8573 (3.55%)                       | 218 (3.72%)                   | 7.54E-01                   | 7.94E-01                   | 1.03      | 0.89-1.18     | 5.04%                   |

<sup>a</sup>P value for Fisher's exact test.

<sup>b</sup>Q value for FDR-BH adjustment.

**Table S7.23. Results of HLA-DRB1 subtypes significantly associated with HBV infection in the Taiwanese population.** Abbreviations: OR, odds ratio; CI, confidence interval; N, allele number.

| <i>Genotype</i> | <i>HBSag-</i><br><i>N=114,898</i> | <i>HBSag+</i><br><i>N=22,632</i> | <i>P-value<sup>a</sup></i> | <i>Q-value<sup>b</sup></i> | <i>OR</i> | <i>95% CI</i> | <i>Allele Frequency</i> |
|-----------------|-----------------------------------|----------------------------------|----------------------------|----------------------------|-----------|---------------|-------------------------|
| *01:01          | 423 (0.37%)                       | 50 (0.22%)                       | 1.71E-05                   | 3.11E-05                   | 1.84      | 1.37-2.52     | 0.45%                   |
| *03:01          | 7781 (6.77%)                      | 1436 (6.34%)                     | 2.91E-09                   | 7.27E-09                   | 1.19      | 1.12-1.27     | 8.23%                   |
| *04:01          | 101 (0.09%)                       | 18 (0.08%)                       | 5.48E-01                   | 6.09E-01                   | 1.22      | 0.73-2.13     | 0.24%                   |
| *04:03          | 48 (0.04%)                        | 3 (0.01%)                        | 2.61E-02                   | 3.26E-02                   | 3.47      | 1.12-17.4     | 3.54%                   |

|        |                |               |          |          |      |            |        |
|--------|----------------|---------------|----------|----------|------|------------|--------|
| *04:05 | 6694 (5.83%)   | 1358 (6%)     | 2.15E-02 | 2.86E-02 | 1.07 | 1.01-1.14  | 7.55%  |
| *07:01 | 1896 (1.65%)   | 248 (1.1%)    | 1.28E-15 | 5.10E-15 | 1.67 | 1.46-1.92  | 2.15%  |
| *08:03 | 8250 (7.18%)   | 1772 (7.83%)  | 7.51E-01 | 7.90E-01 | 1.01 | 0.96-1.07  | 8.65%  |
| *08:09 | 16 (0.01%)     | 2 (0.01%)     | 7.57E-01 | 7.57E-01 | 1.73 | 0.41-15.53 | 1.10%  |
| *09:01 | 14069 (12.24%) | 3457 (15.27%) | 2.85E-13 | 8.15E-13 | 0.86 | 0.82-0.89  | 15.15% |
| *10:01 | 998 (0.87%)    | 144 (0.64%)   | 1.94E-06 | 3.88E-06 | 1.51 | 1.26-1.81  | 1.08%  |
| *11:01 | 6059 (5.27%)   | 1506 (6.65%)  | 8.55E-07 | 1.90E-06 | 0.86 | 0.81-0.91  | 8.59%  |
| *12:01 | 2767 (2.41%)   | 677 (2.99%)   | 4.24E-03 | 7.06E-03 | 0.88 | 0.81-0.96  | 4.05%  |
| *12:02 | 9131 (7.95%)   | 2459 (10.87%) | 8.49E-24 | 5.66E-23 | 0.78 | 0.74-0.82  | 9.89%  |
| *13:01 | 326 (0.28%)    | 13 (0.06%)    | 6.64E-15 | 2.21E-14 | 5.45 | 3.14-10.35 | 0.38%  |
| *13:02 | 2191 (1.91%)   | 139 (0.61%)   | 5.58E-65 | 1.12E-63 | 3.48 | 2.93-4.17  | 2.18%  |
| *14:05 | 1595 (1.39%)   | 362 (1.6%)    | 4.20E-01 | 4.94E-01 | 0.95 | 0.85-1.07  | 2.63%  |
| *14:54 | 2587 (2.25%)   | 793 (3.5%)    | 2.96E-17 | 1.48E-16 | 0.7  | 0.64-0.76  | 4.26%  |
| *15:01 | 6906 (6.01%)   | 1076 (4.75%)  | 1.50E-27 | 1.50E-26 | 1.43 | 1.34-1.53  | 8.34%  |
| *15:02 | 1529 (1.33%)   | 284 (1.25%)   | 1.56E-02 | 2.23E-02 | 1.17 | 1.03-1.33  | 1.90%  |
| *16:02 | 4165 (3.62%)   | 993 (4.39%)   | 5.59E-03 | 8.60E-03 | 0.9  | 0.84-0.97  | 5.04%  |

<sup>a</sup>P value for Fisher's exact test.

<sup>b</sup>Q value for FDR-BH adjustment.

**Table S7.24. Results of HLA-DRB1 subtypes significantly associated with HCV infection in the Taiwanese population.** Abbreviations: OR, odds ratio; CI, confidence interval; N, allele number.

| <i>Genotype</i> | <i>HCVab-</i><br><i>N=113,974</i> | <i>HCVab+</i><br><i>N=10,048</i> | <i>P-value</i> <sup>a</sup> | <i>Q-value</i> <sup>b</sup> | <i>OR</i> | <i>95% CI</i> | <i>Allele Frequency</i> |
|-----------------|-----------------------------------|----------------------------------|-----------------------------|-----------------------------|-----------|---------------|-------------------------|
| *01:01          | 389 (0.34%)                       | 36 (0.36%)                       | 7.89E-01                    | 9.29E-01                    | 0.96      | 0.68-1.39     | 0.45%                   |
| *03:01          | 7553 (6.63%)                      | 766 (7.62%)                      | 2.00E-04                    | 4.01E-03                    | 0.86      | 0.79-0.93     | 8.23%                   |
| *04:01          | 99 (0.09%)                        | 5 (0.05%)                        | 2.80E-01                    | 6.22E-01                    | 1.75      | 0.73-5.52     | 0.24%                   |
| *04:03          | 42 (0.04%)                        | 4 (0.04%)                        | 7.87E-01                    | 9.84E-01                    | 0.93      | 0.34-3.57     | 3.54%                   |
| *04:05          | 6667 (5.85%)                      | 615 (6.12%)                      | 3.02E-01                    | 6.05E-01                    | 0.96      | 0.88-1.04     | 7.55%                   |
| *07:01          | 1739 (1.53%)                      | 189 (1.88%)                      | 7.87E-03                    | 7.87E-02                    | 0.81      | 0.7-0.95      | 2.15%                   |
| *08:03          | 8348 (7.32%)                      | 693 (6.9%)                       | 9.11E-02                    | 3.04E-01                    | 1.07      | 0.99-1.17     | 8.65%                   |
| *08:09          | 12 (0.01%)                        | 1 (0.01%)                        | 1.00E+00                    | 1.00E+00                    | 1.06      | 0.16-45.4     | 1.10%                   |
| *09:01          | 14568 (12.78%)                    | 1228 (12.22%)                    | 7.08E-02                    | 2.83E-01                    | 1.06      | 0.99-1.13     | 15.15%                  |
| *10:01          | 957 (0.84%)                       | 91 (0.91%)                       | 4.95E-01                    | 9.00E-01                    | 0.93      | 0.75-1.17     | 1.08%                   |
| *11:01          | 6283 (5.51%)                      | 524 (5.21%)                      | 1.80E-01                    | 4.50E-01                    | 1.07      | 0.97-1.17     | 8.59%                   |
| *12:01          | 2871 (2.52%)                      | 227 (2.26%)                      | 1.01E-01                    | 2.88E-01                    | 1.12      | 0.98-1.29     | 4.05%                   |
| *12:02          | 9673 (8.49%)                      | 800 (7.96%)                      | 5.15E-02                    | 2.57E-01                    | 1.08      | 1-1.17        | 9.89%                   |
| *13:01          | 288 (0.25%)                       | 23 (0.23%)                       | 7.55E-01                    | 1.01E+00                    | 1.11      | 0.72-1.78     | 0.38%                   |
| *13:02          | 1920 (1.68%)                      | 206 (2.05%)                      | 8.96E-03                    | 5.97E-02                    | 0.82      | 0.71-0.95     | 2.18%                   |
| *14:05          | 1623 (1.42%)                      | 146 (1.45%)                      | 8.26E-01                    | 9.18E-01                    | 0.98      | 0.83-1.18     | 2.63%                   |
| *14:54          | 2785 (2.44%)                      | 257 (2.56%)                      | 4.99E-01                    | 8.32E-01                    | 0.96      | 0.84-1.09     | 4.26%                   |
| *15:01          | 6614 (5.8%)                       | 595 (5.92%)                      | 6.85E-01                    | 9.79E-01                    | 0.98      | 0.9-1.07      | 8.34%                   |
| *15:02          | 1474 (1.29%)                      | 138 (1.37%)                      | 5.19E-01                    | 7.99E-01                    | 0.94      | 0.79-1.13     | 1.90%                   |

|        |              |             |          |          |      |           |       |
|--------|--------------|-------------|----------|----------|------|-----------|-------|
| *16:02 | 4209 (3.69%) | 368 (3.66%) | 8.46E-01 | 8.90E-01 | 1.01 | 0.91-1.13 | 5.04% |
|--------|--------------|-------------|----------|----------|------|-----------|-------|

<sup>a</sup>P value for Fisher's exact test.  
<sup>b</sup>Q value for FDR-BH adjustment.

**Table S8.1. Results of quantiles of PRS of the target dataset.** Abbreviations: OR, odds ratio; CI, confidence interval.

| <i>Quantile</i> | <i>OR</i>   | <i>CI.Upper</i> | <i>CI.Lower</i> | <i>N</i> |
|-----------------|-------------|-----------------|-----------------|----------|
| [0,1]           | 0.359553415 | 1.186713649     | 0.108938377     | 473      |
| (1,5]           | 0.561294378 | 0.966649979     | 0.325920845     | 1892     |
| (5,10]          | 0.722321362 | 1.130940544     | 0.461340035     | 2364     |
| (10,20]         | 0.81282765  | 1.136814776     | 0.581175406     | 4728     |
| (20,30]         | 0.879591326 | 1.225371672     | 0.631384679     | 4728     |
| (30,40]         | 1.07317296  | 1.469586553     | 0.783689943     | 4729     |
| (40,50]         | 1           | 1               | 1               | 4728     |
| (50,60]         | 1.036937508 | 1.416281484     | 0.759198935     | 4728     |
| (60,70]         | 1.231190325 | 1.663306863     | 0.911334913     | 4729     |
| (70,80]         | 1.334444882 | 1.790418412     | 0.994596084     | 4728     |
| (80,90]         | 1.345403252 | 1.803948629     | 1.003415442     | 4728     |
| (90,95]         | 1.567832842 | 2.18397512      | 1.125516403     | 2364     |
| (95,100]        | 1.654383368 | 2.295012592     | 1.19257922      | 2365     |

**Table S8.2. Results of the performance of the PRS model in target and validate datasets.** PRS-only: PRS was used in the model only. Clinical: demographics (age, sex, and BMI) and bioclinical data (albumin, HBV, and HCV) were used in model building. Combine: PRS and clinical data both were applied for building a model. Abbreviations: AUC, area under the curve; CI, confidence interval.

| <i>Dataset</i> | <i>Condition</i> | <i>Accuracy (CI)</i> | <i>AUC</i> | <i>Sensitive</i> | <i>Specificity</i> | <i>Kappa</i> |
|----------------|------------------|----------------------|------------|------------------|--------------------|--------------|
| Target         | PRS-only         | 0.555 (0.551-0.560)  | 0.578      | 0.561            | 0.549              | 0.11         |
|                | Clinical         | 0.771 (0.767-0.774)  | 0.846      | 0.796            | 0.745              | 0.541        |
|                | Combine          | 0.775 (0.771-0.779)  | 0.851      | 0.799            | 0.751              | 0.549        |
| Validate       | PRS-only         | 0.546 (0.520-0.571)  | 0.581      | 0.581            | 0.543              | 0.029        |
|                | Clinical         | 0.594 (0.568-0.618)  | 0.842      | 0.919            | 0.574              | 0.116        |
|                | Combine          | 0.611 (0.586-0.636)  | 0.843      | 0.895            | 0.594              | 0.119        |

**Table S8.3. Results of the performance by using PRS, clinical data, and combined both to predict the risk of the high PRS group for HCC development.** Abbreviations: AUC, area under curve; CI, confidence interval.

| <i>Top of PRS</i> | <i>Model</i> | <i>AUC (95% CI)</i> | <i>N</i> |
|-------------------|--------------|---------------------|----------|
| >=95%             | PRS-only     | 0.686 (0.501-0.870) | 90       |
|                   | Clinical     | 0.857 (0.724-0.991) |          |
|                   | Combine      | 0.811 (0.672-0.949) |          |
| >=90%             | PRS-only     | 0.565 (0.390-0.739) | 165      |
|                   | Clinical     | 0.855 (0.750-0.959) |          |
|                   | Combine      | 0.831 (0.726-0.973) |          |
| >=85%             | PRS-only     | 0.496 (0.337-0.655) | 240      |
|                   | Clinical     | 0.854 (0.758-0.950) |          |
|                   | Combine      | 0.824 (0.714-0.934) |          |
| >=80%             | PRS-only     | 0.468 (0.320-0.615) | 315      |
|                   | Clinical     | 0.827 (0.732-0.921) |          |
|                   | Combine      | 0.802 (0.699-0.905) |          |

**Table S9. PheWAS Results by HCC PRS in Taiwanese.**

| <b>description</b>                             | <b>group</b>        | <b>q-val</b> |
|------------------------------------------------|---------------------|--------------|
| Viral hepatitis B                              | infectious diseases | 8.92E-03     |
| Viral hepatitis                                | infectious diseases | 1.25E-03     |
| Cancer of liver and intrahepatic bile duct     | neoplasms           | 1.09E-02     |
| Althete's foot                                 | infectious diseases | 7.87E-04     |
| Acute, but ill-defined cerebrovascular disease | circulatory system  | 2.73E-03     |

**Table S10. Results of PRS distribution among different family cancer groups.** Abbreviation: mPRS, mean of PRS.

| <i>Type</i> | <i>5 Group</i> |                   | <i>Type</i> | <i>3 Group</i> |                   |
|-------------|----------------|-------------------|-------------|----------------|-------------------|
|             | <i>N</i>       | <i>mPRS (SD)</i>  |             | <i>N</i>       | <i>mPRS (SD)</i>  |
| Liver       | 798            | -0.150862 (0.988) | Liver       | 1358           | -0.110848 (0.988) |
| Liver+      | 560            | -0.053828 (0.987) |             |                |                   |
| Other       | 3980           | -0.235087 (1.014) | Other       | 5560           | -0.232855 (1.009) |
| Other+      | 1580           | -0.227234 (0.995) |             |                |                   |
| Healthy     | 11665          | -0.181311 (1.004) | Healthy     | 11665          | -0.181311 (1.004) |
